# Supplementary material for: Distribution and diversity of myxomycetes in Tiantangzhai National Forest Park, China
Source: PeerJ. 2021 Aug 25;9:e12059. doi: 10.7717/peerj.12059 (PMC8401731; doi:10.7717/peerj.12059)
Supplement: Supplemental Information 1 [file peerj-09-12059-s001.xlsx]

## Sheet: Sheet1
Supplemental data 1 Specimen records of myxomycetes in Tiantiangzhai National Forest Park
Year	Month	Site	Species	Substrate	Methods
2015	May	JP	Cribraria confusa	Bark	Moist chamber culture
2015	May	JP	Cribraria confusa	Bark	Moist chamber culture
2015	May	YF	Colloderma oculatum	Bark	Moist chamber culture
2015	May	YF	Clastoderma debaryanum	Bark	Moist chamber culture
2015	May	JP	Clastoderma debaryanum	Bark	Moist chamber culture
2015	May	YF	Diderma effusum	Bark	Moist chamber culture
2015	May	JP	Arcyria cinerea	Litter	Moist chamber culture
2015	May	YF	Perichaena corticalis	Bark	Moist chamber culture
2015	May	YF	Clastoderma debaryanum	Bark	Moist chamber culture
2015	May	YF	Colloderma oculatum	Bark	Moist chamber culture
2015	May	YF	Arcyria cinerea	Bark	Moist chamber culture
2015	May	JP	Perichaena corticalis	Bark	Moist chamber culture
2015	May	YF	Licea operculata	Bark	Moist chamber culture
2015	May	YF	Echinostelium minutum	Bark	Moist chamber culture
2015	May	YF	Arcyria cinerea	Bark	Moist chamber culture
2015	May	YF	Diderma effusum	Bark	Moist chamber culture
2015	May	JP	Diderma effusum	Bark	Moist chamber culture
2015	May	YF	Clastoderma debaryanum	Bark	Moist chamber culture
2015	May	YF	Clastoderma debaryanum	Bark	Moist chamber culture
2015	May	YF	Colloderma oculatum	Bark	Moist chamber culture
2015	May	YF	Diderma effusum	Bark	Moist chamber culture
2015	May	YF	Diderma effusum	Bark	Moist chamber culture
2015	May	JP	Macbrideola scintillans	Bark	Moist chamber culture
2015	May	YF	Licea operculata	Bark	Moist chamber culture
2015	May	YF	Colloderma oculatum	Bark	Moist chamber culture
2015	May	YF	Clastoderma debaryanum	Bark	Moist chamber culture
2015	May	YF	Arcyria cinerea	Bark	Moist chamber culture
2015	May	YF	Diderma effusum	Bark	Moist chamber culture
2015	May	YF	Arcyria cinerea	Bark	Moist chamber culture
2015	May	JP	Macbrideola scintillans	Bark	Moist chamber culture
2015	May	YF	Colloderma oculatum	Bark	Moist chamber culture
2015	May	YF	Physarum album	Bark	Moist chamber culture
2015	May	YF	Hemitrichia serpula	Litter	Moist chamber culture
2015	May	YF	Arcyria cinerea	Bark	Moist chamber culture
2015	May	YF	Clastoderma debaryanum	Bark	Moist chamber culture
2015	May	YF	Licea biforis	Bark	Moist chamber culture
2015	May	JP	Macbrideola scintillans	Bark	Moist chamber culture
2015	May	PP	Colloderma oculatum	Bark	Moist chamber culture
2015	May	PP	Colloderma oculatum	Bark	Moist chamber culture
2015	May	JP	Macbrideola scintillans	Bark	Moist chamber culture
2015	May	PP	Arcyria denudata	Litter	Moist chamber culture
2015	May	PP	Clastoderma debaryanum	Bark	Moist chamber culture
2015	May	PP	Colloderma oculatum	Bark	Moist chamber culture
2015	May	YF	Clastoderma debaryanum	Bark	Moist chamber culture
2015	May	PP	Colloderma oculatum	Bark	Moist chamber culture
2015	May	PP	Colloderma oculatum	Bark	Moist chamber culture
2015	May	YF	Arcyria cinerea	Bark	Moist chamber culture
2015	May	JP	Cribraria confusa	Bark	Moist chamber culture
2015	May	JP	Macbrideola scintillans	Bark	Moist chamber culture
2015	May	JP	Perichaena corticalis	Bark	Moist chamber culture
2015	May	PP	Colloderma oculatum	Bark	Moist chamber culture
2015	May	YF	Colloderma oculatum	Bark	Moist chamber culture
2015	May	PP	Licea minima	Bark	Moist chamber culture
2015	May	PP	Licea minima	Bark	Moist chamber culture
2015	May	PP	Colloderma oculatum	Bark	Moist chamber culture
2015	May	PP	Colloderma oculatum	Bark	Moist chamber culture
2015	May	PP	Echinostelium minutum	Bark	Moist chamber culture
2015	May	PP	Perichaena corticalis	Bark	Moist chamber culture
2015	May	WF	Arcyria cinerea	Bark	Moist chamber culture
2015	May	WF	Arcyria cinerea	Bark	Moist chamber culture
2015	May	WF	Colloderma oculatum	Bark	Moist chamber culture
2015	May	WF	Colloderma oculatum	Bark	Moist chamber culture
2015	May	WF	Arcyria denudata	Litter	Moist chamber culture
2015	May	WF	Colloderma oculatum	Bark	Moist chamber culture
2015	May	WF	Colloderma oculatum	Bark	Moist chamber culture
2015	May	WF	Colloderma oculatum	Bark	Moist chamber culture
2015	May	WF	Colloderma oculatum	Bark	Moist chamber culture
2015	May	WF	Clastoderma debaryanum	Bark	Moist chamber culture
2015	May	WF	Colloderma oculatum	Bark	Moist chamber culture
2015	May	WF	Colloderma oculatum	Bark	Moist chamber culture
2015	May	OB	Clastoderma debaryanum	Bark	Moist chamber culture
2015	May	OB	Clastoderma debaryanum	Bark	Moist chamber culture
2015	May	OB	Clastoderma debaryanum	Bark	Moist chamber culture
2015	May	OB	Clastoderma debaryanum	Bark	Moist chamber culture
2015	May	OB	Licea operculata	Bark	Moist chamber culture
2015	May	OB	Colloderma oculatum	Bark	Moist chamber culture
2015	May	OB	Colloderma oculatum	Bark	Moist chamber culture
2015	May	OB	Clastoderma debaryanum	Litter	Moist chamber culture
2015	May	OB	Colloderma oculatum	Bark	Moist chamber culture
2015	June	QF	Stemonitis fusca	Bark	Moist chamber culture
2015	June	QF	Trichia favoginea	Bark	Moist chamber culture
2015	June	QF	Trichia favoginea	Bark	Moist chamber culture
2015	June	QF	Didymium minus	Bark	Moist chamber culture
2015	June	JP	Physarum pusillum	Bark	Moist chamber culture
2015	June	JP	Arcyria cinerea	Bark	Moist chamber culture
2015	June	JP	Clastoderma debaryanum	Bark	Moist chamber culture
2015	June	JP	Cribraria confusa	Bark	Moist chamber culture
2015	June	JP	Cribraria confusa	Bark	Moist chamber culture
2015	June	JP	Echinostelium minutum	Bark	Moist chamber culture
2015	June	JP	Echinostelium minutum	Bark	Moist chamber culture
2015	June	JP	Licea pedicellata	Bark	Moist chamber culture
2015	June	JP	Physarum album	Bark	Moist chamber culture
2015	June	YF	Arcyria cinerea	Bark	Moist chamber culture
2015	June	YF	Arcyria cinerea	Bark	Moist chamber culture
2015	June	YF	Arcyria cinerea	Litter	Moist chamber culture
2015	June	YF	Arcyria denudata	Litter	Moist chamber culture
2015	June	YF	Clastoderma debaryanum	Bark	Moist chamber culture
2015	June	YF	Clastoderma debaryanum	Litter	Moist chamber culture
2015	June	YF	Colloderma oculatum	Bark	Moist chamber culture
2015	June	YF	Colloderma oculatum	Bark	Moist chamber culture
2015	June	YF	Colloderma oculatum	Bark	Moist chamber culture
2015	June	YF	Comatricha pulchella	Litter	Moist chamber culture
2015	June	YF	Cribraria minutissima	Bark	Moist chamber culture
2015	June	YF	Diderma effusum	Litter	Moist chamber culture
2015	June	YF	Echinostelium minutum	Bark	Moist chamber culture
2015	June	YF	Perichaena corticalis	Litter	Moist chamber culture
2015	June	YF	Stemonitis fusca	Litter	Moist chamber culture
2015	June	YF	Arcyria cinerea	Bark	Moist chamber culture
2015	June	YF	Arcyria cinerea	Bark	Moist chamber culture
2015	June	YF	Diderma effusum	Bark	Moist chamber culture
2015	June	YF	Diderma effusum	Bark	Moist chamber culture
2015	June	YF	Diderma effusum	Bark	Moist chamber culture
2015	June	YF	Diderma effusum	Bark	Moist chamber culture
2015	June	YF	Perichaena corticalis	Litter	Moist chamber culture
2015	June	YF	Arcyria cinerea	Litter	Moist chamber culture
2015	June	YF	Clastoderma debaryanum	Bark	Moist chamber culture
2015	June	YF	Colloderma oculatum	Bark	Moist chamber culture
2015	June	YF	Colloderma oculatum	Bark	Moist chamber culture
2015	June	YF	Arcyria cinerea	Litter	Moist chamber culture
2015	June	YF	Diderma effusum	Litter	Moist chamber culture
2015	June	PP	Arcyria cinerea	Litter	Moist chamber culture
2015	June	PP	Diderma effusum	Bark	Moist chamber culture
2015	June	PP	Diderma effusum	Bark	Moist chamber culture
2015	June	PP	Echinostelium minutum	Bark	Moist chamber culture
2015	June	PP	Diderma effusum	Litter	Moist chamber culture
2015	June	PP	Diderma effusum	Litter	Moist chamber culture
2015	June	PP	Didymium squamulosum	Bark	Moist chamber culture
2015	June	PP	Perichaena corticalis	Bark	Moist chamber culture
2015	June	PP	Stemonitis fusca	Litter	Moist chamber culture
2015	June	PP	Arcyria cinerea	Litter	Moist chamber culture
2015	June	PP	Diderma effusum	Bark	Moist chamber culture
2015	June	PP	Diderma effusum	Bark	Moist chamber culture
2015	June	PP	Licea kleistobolus	Litter	Moist chamber culture
2015	June	PP	Physarum album	Bark	Moist chamber culture
2015	June	PP	Arcyria cinerea	Litter	Moist chamber culture
2015	June	PP	Arcyria cinerea	Litter	Moist chamber culture
2015	June	PP	Clastoderma debaryanum	Bark	Moist chamber culture
2015	June	PP	Colloderma oculatum	Bark	Moist chamber culture
2015	June	PP	Colloderma oculatum	Bark	Moist chamber culture
2015	June	PP	Colloderma oculatum	Bark	Moist chamber culture
2015	June	PP	Echinostelium minutum	Bark	Moist chamber culture
2015	June	PP	Echinostelium minutum	Bark	Moist chamber culture
2015	June	PP	Echinostelium minutum	Bark	Moist chamber culture
2015	June	PP	Arcyria cinerea	Bark	Moist chamber culture
2015	June	PP	Arcyria cinerea	Litter	Moist chamber culture
2015	June	PP	Arcyria cinerea	Litter	Moist chamber culture
2015	June	PP	Arcyria denudata	Litter	Moist chamber culture
2015	June	PP	Clastoderma debaryanum	Bark	Moist chamber culture
2015	June	PP	Colloderma oculatum	Bark	Moist chamber culture
2015	June	PP	Colloderma oculatum	Bark	Moist chamber culture
2015	June	PP	Colloderma oculatum	Bark	Moist chamber culture
2015	June	PP	Cribraria minutissima	Bark	Moist chamber culture
2015	June	WF	Arcyria denudata	Litter	Moist chamber culture
2015	June	WF	Clastoderma debaryanum	Bark	Moist chamber culture
2015	June	WF	Colloderma oculatum	Bark	Moist chamber culture
2015	June	WF	Colloderma oculatum	Bark	Moist chamber culture
2015	June	WF	Colloderma oculatum	Bark	Moist chamber culture
2015	June	WF	Diderma effusum	Litter	Moist chamber culture
2015	June	WF	Arcyria cinerea	Bark	Moist chamber culture
2015	June	WF	Arcyria cinerea	Litter	Moist chamber culture
2015	June	WF	Echinostelium minutum	Bark	Moist chamber culture
2015	June	WF	Arcyria cinerea	Bark	Moist chamber culture
2015	June	WF	Arcyria cinerea	Bark	Moist chamber culture
2015	June	WF	Arcyria cinerea	Litter	Moist chamber culture
2015	June	WF	Colloderma oculatum	Bark	Moist chamber culture
2015	June	WF	Arcyria cinerea	Bark	Moist chamber culture
2015	June	WF	Arcyria cinerea	Litter	Moist chamber culture
2015	June	WF	Arcyria cinerea	Litter	Moist chamber culture
2015	June	WF	Arcyria cinerea	Litter	Moist chamber culture
2015	June	WF	Arcyria denudata	Litter	Moist chamber culture
2015	June	WF	Colloderma oculatum	Bark	Moist chamber culture
2015	June	WF	Echinostelium minutum	Bark	Moist chamber culture
2015	June	WF	Echinostelium minutum	Bark	Moist chamber culture
2015	June	WF	Arcyria cinerea	Bark	Moist chamber culture
2015	June	WF	Arcyria cinerea	Bark	Moist chamber culture
2015	June	WF	Arcyria cinerea	Litter	Moist chamber culture
2015	June	WF	Arcyria cinerea	Litter	Moist chamber culture
2015	June	WF	Arcyria denudata	Litter	Moist chamber culture
2015	June	WF	Clastoderma debaryanum	Bark	Moist chamber culture
2015	June	OB	Arcyria cinerea	Bark	Moist chamber culture
2015	June	OB	Arcyria cinerea	Litter	Moist chamber culture
2015	June	OB	Arcyria cinerea	Litter	Moist chamber culture
2015	June	OB	Arcyria cinerea	Litter	Moist chamber culture
2015	June	OB	Clastoderma debaryanum	Bark	Moist chamber culture
2015	June	OB	Clastoderma debaryanum	Bark	Moist chamber culture
2015	June	OB	Clastoderma debaryanum	Litter	Moist chamber culture
2015	June	OB	Echinostelium minutum	Bark	Moist chamber culture
2015	June	OB	Echinostelium minutum	Bark	Moist chamber culture
2015	June	OB	Echinostelium minutum	Litter	Moist chamber culture
2015	June	OB	Arcyria cinerea	Litter	Moist chamber culture
2015	June	OB	Clastoderma debaryanum	Bark	Moist chamber culture
2015	June	OB	Echinostelium minutum	Bark	Moist chamber culture
2015	June	OB	Echinostelium minutum	Bark	Moist chamber culture
2015	June	OB	Arcyria cinerea	Bark	Moist chamber culture
2015	June	OB	Arcyria denudata	Litter	Moist chamber culture
2015	June	OB	Arcyria denudata	Litter	Moist chamber culture
2015	June	OB	Diderma effusum	Litter	Moist chamber culture
2015	June	OB	Arcyria cinerea	Bark	Moist chamber culture
2015	June	OB	Arcyria cinerea	Litter	Moist chamber culture
2015	June	OB	Arcyria cinerea	Litter	Moist chamber culture
2015	June	OB	Diderma effusum	Litter	Moist chamber culture
2015	June	OB	Arcyria cinerea	Litter	Moist chamber culture
2015	June	OB	Clastoderma debaryanum	Litter	Moist chamber culture
2015	July	QF	Licea operculata	Bark	Moist chamber culture
2015	July	QF	Licea operculata	Bark	Moist chamber culture
2015	July	QF	Licea pedicellata	Bark	Moist chamber culture
2015	July	JP	Perichaena corticalis	Litter	Moist chamber culture
2015	July	JP	Physarum nucleatum	Litter	Moist chamber culture
2015	July	JP	Stemonitis fusca	Litter	Moist chamber culture
2015	July	JP	Stemonitis fusca	Litter	Moist chamber culture
2015	July	JP	Diderma effusum	Litter	Moist chamber culture
2015	July	JP	Clastoderma debaryanum	Bark	Moist chamber culture
2015	July	JP	Clastoderma debaryanum	Bark	Moist chamber culture
2015	July	JP	Perichaena corticalis	Litter	Moist chamber culture
2015	July	YF	Colloderma oculatum	Bark	Moist chamber culture
2015	July	YF	Colloderma oculatum	Bark	Moist chamber culture
2015	July	YF	Paradiacheopsis erythropodia	Bark	Moist chamber culture
2015	July	YF	Arcyria cinerea	Bark	Moist chamber culture
2015	July	YF	Arcyria cinerea	Bark	Moist chamber culture
2015	July	YF	Arcyria cinerea	Bark	Moist chamber culture
2015	July	YF	Calomyxa metallica	Bark	Moist chamber culture
2015	July	YF	Calomyxa metallica	Bark	Moist chamber culture
2015	July	YF	Diderma effusum	Bark	Moist chamber culture
2015	July	YF	Diderma effusum	Bark	Moist chamber culture
2015	July	YF	Licea biforis	Bark	Moist chamber culture
2015	July	YF	Licea operculata	Bark	Moist chamber culture
2015	July	YF	Physarum pusillum	Bark	Moist chamber culture
2015	July	YF	Clastoderma debaryanum	Bark	Moist chamber culture
2015	July	YF	Colloderma oculatum	Bark	Moist chamber culture
2015	July	YF	Echinostelium minutum	Bark	Moist chamber culture
2015	July	YF	Echinostelium minutum	Bark	Moist chamber culture
2015	July	YF	Echinostelium minutum	Bark	Moist chamber culture
2015	July	YF	Paradiacheopsis erythropodia	Bark	Moist chamber culture
2015	July	YF	Paradiacheopsis erythropodia	Bark	Moist chamber culture
2015	July	YF	Licea operculata	Bark	Moist chamber culture
2015	July	YF	Physarum cinereum	Litter	Moist chamber culture
2015	July	YF	Trichia botrytis	Bark	Moist chamber culture
2015	July	YF	Arcyria cinerea	Bark	Moist chamber culture
2015	July	YF	Clastoderma debaryanum	Bark	Moist chamber culture
2015	July	YF	Clastoderma debaryanum	Bark	Moist chamber culture
2015	July	YF	Diderma effusum	Bark	Moist chamber culture
2015	July	PP	Perichaena corticalis	Bark	Moist chamber culture
2015	July	PP	Clastoderma debaryanum	Bark	Moist chamber culture
2015	July	PP	Colloderma oculatum	Bark	Moist chamber culture
2015	July	PP	Colloderma oculatum	Bark	Moist chamber culture
2015	July	PP	Colloderma oculatum	Bark	Moist chamber culture
2015	July	PP	Echinostelium minutum	Bark	Moist chamber culture
2015	July	PP	Echinostelium minutum	Bark	Moist chamber culture
2015	July	PP	Echinostelium minutum	Bark	Moist chamber culture
2015	July	PP	Colloderma oculatum	Bark	Moist chamber culture
2015	July	PP	Colloderma oculatum	Bark	Moist chamber culture
2015	July	PP	Colloderma oculatum	Bark	Moist chamber culture
2015	July	PP	Echinostelium minutum	Bark	Moist chamber culture
2015	July	PP	Licea operculata	Bark	Moist chamber culture
2015	July	PP	Arcyria cinerea	Litter	Moist chamber culture
2015	July	PP	Colloderma oculatum	Bark	Moist chamber culture
2015	July	PP	Colloderma oculatum	Bark	Moist chamber culture
2015	July	PP	Colloderma oculatum	Bark	Moist chamber culture
2015	July	PP	Cribraria microcarpa	Bark	Moist chamber culture
2015	July	WF	Arcyria cinerea	Litter	Moist chamber culture
2015	July	WF	Clastoderma debaryanum	Bark	Moist chamber culture
2015	July	WF	Colloderma oculatum	Bark	Moist chamber culture
2015	July	WF	Colloderma oculatum	Bark	Moist chamber culture
2015	July	WF	Echinostelium minutum	Bark	Moist chamber culture
2015	July	WF	Echinostelium minutum	Bark	Moist chamber culture
2015	July	WF	Echinostelium minutum	Bark	Moist chamber culture
2015	July	WF	Stemonitopsis reticulata	Litter	Moist chamber culture
2015	July	WF	Arcyria cinerea	Bark	Moist chamber culture
2015	July	WF	Arcyria cinerea	Litter	Moist chamber culture
2015	July	WF	Clastoderma debaryanum	Bark	Moist chamber culture
2015	July	WF	Clastoderma debaryanum	Bark	Moist chamber culture
2015	July	WF	Clastoderma debaryanum	Bark	Moist chamber culture
2015	July	WF	Colloderma oculatum	Bark	Moist chamber culture
2015	July	WF	Colloderma oculatum	Bark	Moist chamber culture
2015	July	WF	Echinostelium minutum	Bark	Moist chamber culture
2015	July	WF	Echinostelium minutum	Bark	Moist chamber culture
2015	July	WF	Echinostelium minutum	Litter	Moist chamber culture
2015	July	WF	Arcyria cinerea	Litter	Moist chamber culture
2015	July	WF	Clastoderma debaryanum	Bark	Moist chamber culture
2015	July	WF	Clastoderma debaryanum	Bark	Moist chamber culture
2015	July	WF	Clastoderma debaryanum	Bark	Moist chamber culture
2015	July	WF	Colloderma oculatum	Bark	Moist chamber culture
2015	July	WF	Colloderma oculatum	Bark	Moist chamber culture
2015	July	WF	Colloderma oculatum	Bark	Moist chamber culture
2015	July	WF	Physarum pusillum	Litter	Moist chamber culture
2015	July	WF	Arcyria cinerea	Litter	Moist chamber culture
2015	July	WF	Arcyria cinerea	Litter	Moist chamber culture
2015	July	WF	Clastoderma debaryanum	Bark	Moist chamber culture
2015	July	WF	Clastoderma debaryanum	Bark	Moist chamber culture
2015	July	WF	Colloderma oculatum	Bark	Moist chamber culture
2015	July	WF	Echinostelium minutum	Bark	Moist chamber culture
2015	July	WF	Echinostelium minutum	Bark	Moist chamber culture
2015	July	WF	Echinostelium minutum	Litter	Moist chamber culture
2015	July	OB	Clastoderma debaryanum	Bark	Moist chamber culture
2015	July	OB	Colloderma oculatum	Bark	Moist chamber culture
2015	July	OB	Colloderma oculatum	Bark	Moist chamber culture
2015	July	OB	Clastoderma debaryanum	Litter	Moist chamber culture
2015	July	OB	Colloderma oculatum	Bark	Moist chamber culture
2015	July	OB	Echinostelium minutum	Bark	Moist chamber culture
2015	July	OB	Echinostelium minutum	Bark	Moist chamber culture
2015	July	OB	Echinostelium minutum	Bark	Moist chamber culture
2015	July	OB	Echinostelium minutum	Litter	Moist chamber culture
2015	July	OB	Licea operculata	Bark	Moist chamber culture
2015	July	OB	Licea operculata	Bark	Moist chamber culture
2015	July	OB	Paradiacheopsis erythropodia	Bark	Moist chamber culture
2015	July	OB	Colloderma oculatum	Bark	Moist chamber culture
2015	July	OB	Colloderma oculatum	Bark	Moist chamber culture
2015	July	OB	Echinostelium minutum	Bark	Moist chamber culture
2015	July	OB	Echinostelium minutum	Bark	Moist chamber culture
2015	July	OB	Arcyria cinerea	Litter	Moist chamber culture
2015	July	OB	Arcyria cinerea	Litter	Moist chamber culture
2015	July	OB	Clastoderma debaryanum	Litter	Moist chamber culture
2015	August	QF	Arcyria cinerea	Bark	Moist chamber culture
2015	August	QF	Comatricha nigra	Litter	Moist chamber culture
2015	August	QF	Licea operculata	Litter	Moist chamber culture
2015	August	QF	Didymium clavus	Bark	Moist chamber culture
2015	August	QF	Arcyria cinerea	Litter	Moist chamber culture
2015	August	QF	Stemonitopsis reticulata	Litter	Moist chamber culture
2015	August	QF	Stemonitis fusca	Litter	Moist chamber culture
2015	August	JP	Cribraria microcarpa	Bark	Moist chamber culture
2015	August	JP	Licea castanea	Bark	Moist chamber culture
2015	August	JP	Licea operculata	Bark	Moist chamber culture
2015	August	JP	Physarum album	Bark	Moist chamber culture
2015	August	JP	Stemonitis fusca	Bark	Moist chamber culture
2015	August	JP	Stemonitis fusca	Bark	Moist chamber culture
2015	August	JP	Stemonitis fusca	Bark	Moist chamber culture
2015	August	JP	Trichia botrytis	Bark	Moist chamber culture
2015	August	JP	Arcyria cinerea	Litter	Moist chamber culture
2015	August	JP	Arcyria denudata	Litter	Moist chamber culture
2015	August	JP	Licea biforis	Bark	Moist chamber culture
2015	August	JP	Licea pedicellata	Bark	Moist chamber culture
2015	August	JP	Licea pedicellata	Bark	Moist chamber culture
2015	August	JP	Stemonitis fusca	Bark	Moist chamber culture
2015	August	JP	Stemonitis fusca	Litter	Moist chamber culture
2015	August	JP	Clastoderma debaryanum	Bark	Moist chamber culture
2015	August	JP	Clastoderma debaryanum	Bark	Moist chamber culture
2015	August	JP	Echinostelium minutum	Bark	Moist chamber culture
2015	August	JP	Perichaena corticalis	Bark	Moist chamber culture
2015	August	JP	Physarum melleum	Bark	Moist chamber culture
2015	August	JP	Arcyria cinerea	Litter	Moist chamber culture
2015	August	YF	Arcyria cinerea	Litter	Moist chamber culture
2015	August	YF	Arcyria cinerea	Litter	Moist chamber culture
2015	August	YF	Clastoderma debaryanum	Bark	Moist chamber culture
2015	August	YF	Clastoderma debaryanum	Bark	Moist chamber culture
2015	August	YF	Clastoderma debaryanum	Litter	Moist chamber culture
2015	August	YF	Colloderma oculatum	Bark	Moist chamber culture
2015	August	YF	Colloderma oculatum	Bark	Moist chamber culture
2015	August	YF	Licea operculata	Bark	Moist chamber culture
2015	August	YF	Licea operculata	Bark	Moist chamber culture
2015	August	YF	Trichia botrytis	Bark	Moist chamber culture
2015	August	YF	Trichia botrytis	Bark	Moist chamber culture
2015	August	YF	Arcyria cinerea	Litter	Moist chamber culture
2015	August	YF	Comatricha aequalis	Bark	Moist chamber culture
2015	August	YF	Perichaena corticalis	Bark	Moist chamber culture
2015	August	YF	Perichaena corticalis	Bark	Moist chamber culture
2015	August	YF	Clastoderma debaryanum	Bark	Moist chamber culture
2015	August	YF	Clastoderma debaryanum	Bark	Moist chamber culture
2015	August	YF	Clastoderma debaryanum	Litter	Moist chamber culture
2015	August	YF	Colloderma oculatum	Bark	Moist chamber culture
2015	August	YF	Cribraria microcarpa	Litter	Moist chamber culture
2015	August	YF	Echinostelium minutum	Bark	Moist chamber culture
2015	August	YF	Licea minima	Bark	Moist chamber culture
2015	August	YF	Licea operculata	Bark	Moist chamber culture
2015	August	YF	Licea operculata	Bark	Moist chamber culture
2015	August	YF	Arcyria cinerea	Litter	Moist chamber culture
2015	August	YF	Clastoderma debaryanum	Bark	Moist chamber culture
2015	August	YF	Clastoderma debaryanum	Litter	Moist chamber culture
2015	August	YF	Clastoderma debaryanum	Litter	Moist chamber culture
2015	August	YF	Colloderma oculatum	Bark	Moist chamber culture
2015	August	YF	Colloderma oculatum	Bark	Moist chamber culture
2015	August	YF	Cribraria microcarpa	Litter	Moist chamber culture
2015	August	YF	Licea operculata	Bark	Moist chamber culture
2015	August	YF	Paradiacheopsis erythropodia	Bark	Moist chamber culture
2015	August	YF	Arcyria cinerea	Litter	Moist chamber culture
2015	August	YF	Calomyxa metallica	Litter	Moist chamber culture
2015	August	YF	Calomyxa metallica	Litter	Moist chamber culture
2015	August	YF	Clastoderma debaryanum	Litter	Moist chamber culture
2015	August	YF	Clastoderma debaryanum	Litter	Moist chamber culture
2015	August	YF	Diderma effusum	Litter	Moist chamber culture
2015	August	PP	Arcyria cinerea	Bark	Moist chamber culture
2015	August	PP	Diachea subsessilis	Litter	Moist chamber culture
2015	August	PP	Perichaena corticalis	Bark	Moist chamber culture
2015	August	PP	Perichaena corticalis	Bark	Moist chamber culture
2015	August	PP	Perichaena corticalis	Bark	Moist chamber culture
2015	August	PP	Clastoderma debaryanum	Bark	Moist chamber culture
2015	August	PP	Clastoderma debaryanum	Litter	Moist chamber culture
2015	August	PP	Cribraria microcarpa	Bark	Moist chamber culture
2015	August	PP	Cribraria microcarpa	Bark	Moist chamber culture
2015	August	PP	Cribraria microcarpa	Litter	Moist chamber culture
2015	August	PP	Echinostelium minutum	Bark	Moist chamber culture
2015	August	PP	Echinostelium minutum	Litter	Moist chamber culture
2015	August	PP	Trichia botrytis	Bark	Moist chamber culture
2015	August	PP	Licea operculata	Bark	Moist chamber culture
2015	August	PP	Trichia botrytis	Bark	Moist chamber culture
2015	August	PP	Trichia botrytis	Bark	Moist chamber culture
2015	August	PP	Trichia botrytis	Bark	Moist chamber culture
2015	August	PP	Licea operculata	Bark	Moist chamber culture
2015	August	PP	Paradiacheopsis fimbriata	Bark	Moist chamber culture
2015	August	PP	Licea operculata	Bark	Moist chamber culture
2015	August	PP	Licea operculata	Bark	Moist chamber culture
2015	August	PP	Licea operculata	Bark	Moist chamber culture
2015	August	WF	Arcyria cinerea	Litter	Moist chamber culture
2015	August	WF	Colloderma oculatum	Bark	Moist chamber culture
2015	August	WF	Colloderma oculatum	Bark	Moist chamber culture
2015	August	WF	Colloderma oculatum	Bark	Moist chamber culture
2015	August	WF	Echinostelium minutum	Litter	Moist chamber culture
2015	August	WF	Physarum oblatum	Bark	Moist chamber culture
2015	August	WF	Arcyria cinerea	Bark	Moist chamber culture
2015	August	WF	Clastoderma debaryanum	Bark	Moist chamber culture
2015	August	WF	Clastoderma debaryanum	Bark	Moist chamber culture
2015	August	WF	Clastoderma debaryanum	Bark	Moist chamber culture
2015	August	WF	Colloderma oculatum	Bark	Moist chamber culture
2015	August	WF	Colloderma oculatum	Bark	Moist chamber culture
2015	August	WF	Echinostelium minutum	Bark	Moist chamber culture
2015	August	WF	Arcyria cinerea	Litter	Moist chamber culture
2015	August	WF	Clastoderma debaryanum	Bark	Moist chamber culture
2015	August	WF	Clastoderma debaryanum	Bark	Moist chamber culture
2015	August	WF	Clastoderma debaryanum	Bark	Moist chamber culture
2015	August	WF	Colloderma oculatum	Bark	Moist chamber culture
2015	August	WF	Colloderma oculatum	Bark	Moist chamber culture
2015	August	WF	Cribraria microcarpa	Bark	Moist chamber culture
2015	August	WF	Cribraria microcarpa	Bark	Moist chamber culture
2015	August	WF	Echinostelium minutum	Bark	Moist chamber culture
2015	August	WF	Trichia botrytis	Bark	Moist chamber culture
2015	August	WF	Clastoderma debaryanum	Bark	Moist chamber culture
2015	August	WF	Clastoderma debaryanum	Bark	Moist chamber culture
2015	August	WF	Clastoderma debaryanum	Bark	Moist chamber culture
2015	August	WF	Trichia botrytis	Bark	Moist chamber culture
2015	August	WF	Arcyria cinerea	Bark	Moist chamber culture
2015	August	WF	Arcyria cinerea	Litter	Moist chamber culture
2015	August	WF	Arcyria cinerea	Litter	Moist chamber culture
2015	August	WF	Clastoderma debaryanum	Bark	Moist chamber culture
2015	August	WF	Clastoderma debaryanum	Bark	Moist chamber culture
2015	August	WF	Clastoderma debaryanum	Bark	Moist chamber culture
2015	August	WF	Echinostelium minutum	Bark	Moist chamber culture
2015	August	WF	Paradiacheopsis erythropodia	Bark	Moist chamber culture
2015	August	OB	Arcyria denudata	Litter	Moist chamber culture
2015	August	OB	Echinostelium minutum	Bark	Moist chamber culture
2015	August	OB	Echinostelium minutum	Bark	Moist chamber culture
2015	August	OB	Licea operculata	Bark	Moist chamber culture
2015	August	OB	Arcyria cinerea	Litter	Moist chamber culture
2015	August	OB	Colloderma oculatum	Bark	Moist chamber culture
2015	August	OB	Echinostelium minutum	Bark	Moist chamber culture
2015	August	OB	Echinostelium minutum	Bark	Moist chamber culture
2015	August	OB	Stemonitis fusca	Litter	Moist chamber culture
2015	August	OB	Clastoderma debaryanum	Bark	Moist chamber culture
2015	August	OB	Clastoderma debaryanum	Bark	Moist chamber culture
2015	August	OB	Clastoderma debaryanum	Bark	Moist chamber culture
2015	August	OB	Licea operculata	Bark	Moist chamber culture
2015	August	OB	Licea operculata	Bark	Moist chamber culture
2015	August	OB	Clastoderma debaryanum	Bark	Moist chamber culture
2015	August	OB	Licea operculata	Bark	Moist chamber culture
2015	August	OB	Licea operculata	Bark	Moist chamber culture
2015	August	OB	Licea operculata	Bark	Moist chamber culture
2015	August	OB	Paradiacheopsis erythropodia	Bark	Moist chamber culture
2015	August	OB	Arcyria cinerea	Litter	Moist chamber culture
2015	August	OB	Clastoderma debaryanum	Bark	Moist chamber culture
2015	August	OB	Clastoderma debaryanum	Bark	Moist chamber culture
2015	August	OB	Clastoderma debaryanum	Bark	Moist chamber culture
2015	August	OB	Clastoderma debaryanum	Litter	Moist chamber culture
2015	September	QF	Stemonitis fusca	Litter	Moist chamber culture
2015	September	JP	Didymium melanospermum	Bark	Moist chamber culture
2015	September	YF	Cribraria microcarpa	Litter	Moist chamber culture
2015	September	YF	Arcyria denudata	Litter	Moist chamber culture
2015	September	YF	Colloderma oculatum	Bark	Moist chamber culture
2015	September	YF	Licea operculata	Bark	Moist chamber culture
2015	September	YF	Licea operculata	Bark	Moist chamber culture
2015	September	YF	Stemonitis fusca	Litter	Moist chamber culture
2015	September	YF	Arcyria cinerea	Bark	Moist chamber culture
2015	September	YF	Clastoderma debaryanum	Bark	Moist chamber culture
2015	September	YF	Clastoderma debaryanum	Bark	Moist chamber culture
2015	September	YF	Clastoderma debaryanum	Bark	Moist chamber culture
2015	September	YF	Colloderma oculatum	Bark	Moist chamber culture
2015	September	YF	Colloderma oculatum	Bark	Moist chamber culture
2015	September	YF	Colloderma oculatum	Bark	Moist chamber culture
2015	September	PP	Colloderma oculatum	Litter	Moist chamber culture
2015	September	PP	Colloderma oculatum	Bark	Moist chamber culture
2015	September	PP	Colloderma oculatum	Bark	Moist chamber culture
2015	September	PP	Diderma effusum	Bark	Moist chamber culture
2015	September	PP	Licea castanea	Bark	Moist chamber culture
2015	September	PP	Physarum album	Bark	Moist chamber culture
2015	September	PP	Licea operculata	Bark	Moist chamber culture
2015	September	PP	Licea operculata	Bark	Moist chamber culture
2015	September	PP	Licea operculata	Bark	Moist chamber culture
2015	September	PP	Trichia botrytis	Bark	Moist chamber culture
2015	September	PP	Clastoderma debaryanum	Bark	Moist chamber culture
2015	September	PP	Clastoderma debaryanum	Bark	Moist chamber culture
2015	September	PP	Clastoderma debaryanum	Bark	Moist chamber culture
2015	September	PP	Colloderma oculatum	Bark	Moist chamber culture
2015	September	PP	Colloderma oculatum	Bark	Moist chamber culture
2015	September	PP	Colloderma oculatum	Bark	Moist chamber culture
2015	September	WF	Perichaena corticalis	Bark	Moist chamber culture
2015	September	WF	Perichaena corticalis	Bark	Moist chamber culture
2015	September	WF	Arcyria cinerea	Bark	Moist chamber culture
2015	September	WF	Arcyria denudata	Litter	Moist chamber culture
2015	September	WF	Clastoderma debaryanum	Bark	Moist chamber culture
2015	September	WF	Clastoderma debaryanum	Bark	Moist chamber culture
2015	September	WF	Colloderma oculatum	Bark	Moist chamber culture
2015	September	WF	Colloderma oculatum	Bark	Moist chamber culture
2015	September	WF	Clastoderma debaryanum	Bark	Moist chamber culture
2015	September	WF	Licea operculata	Bark	Moist chamber culture
2015	September	WF	Licea operculata	Bark	Moist chamber culture
2015	September	WF	Licea operculata	Bark	Moist chamber culture
2015	September	WF	Arcyria cinerea	Bark	Moist chamber culture
2015	September	WF	Clastoderma debaryanum	Bark	Moist chamber culture
2015	September	WF	Echinostelium minutum	Bark	Moist chamber culture
2015	September	WF	Licea operculata	Bark	Moist chamber culture
2015	September	WF	Physarum album	Bark	Moist chamber culture
2015	September	OB	Clastoderma debaryanum	Bark	Moist chamber culture
2015	September	OB	Clastoderma debaryanum	Bark	Moist chamber culture
2015	September	OB	Clastoderma debaryanum	Bark	Moist chamber culture
2015	September	OB	Colloderma oculatum	Bark	Moist chamber culture
2015	September	OB	Licea operculata	Bark	Moist chamber culture
2015	September	OB	Licea operculata	Bark	Moist chamber culture
2015	September	OB	Licea operculata	Bark	Moist chamber culture
2015	September	OB	Clastoderma debaryanum	Bark	Moist chamber culture
2015	September	OB	Echinostelium minutum	Bark	Moist chamber culture
2015	September	OB	Arcyria denudata	Litter	Moist chamber culture
2015	September	OB	Clastoderma debaryanum	Bark	Moist chamber culture
2015	September	OB	Colloderma oculatum	Bark	Moist chamber culture
2015	September	OB	Colloderma oculatum	Bark	Moist chamber culture
2015	September	OB	Colloderma oculatum	Bark	Moist chamber culture
2015	September	OB	Colloderma oculatum	Bark	Moist chamber culture
2015	September	OB	Colloderma oculatum	Bark	Moist chamber culture
2015	September	OB	Comatricha pulchella	Litter	Moist chamber culture
2015	September	OB	Paradiacheopsis erythropodia	Bark	Moist chamber culture
2015	October	JP	Stemonitopsis reticulata	Litter	Moist chamber culture
2015	October	JP	Ceratiomyxa fruticulosa	Litter	Moist chamber culture
2015	October	JP	Cribraria microcarpa	Litter	Moist chamber culture
2015	October	JP	Licea castanea	Bark	Moist chamber culture
2015	October	JP	Licea castanea	Bark	Moist chamber culture
2015	October	JP	Physarum lateritium	Litter	Moist chamber culture
2015	October	JP	Stemonitis fusca	Bark	Moist chamber culture
2015	October	JP	Stemonitis fusca	Bark	Moist chamber culture
2015	October	JP	Arcyria denudata	Litter	Moist chamber culture
2015	October	JP	Diachea splendens	Litter	Moist chamber culture
2015	October	JP	Arcyria cinerea	Litter	Moist chamber culture
2015	October	JP	Diachea subsessilis	Litter	Moist chamber culture
2015	October	JP	Diderma effusum	Litter	Moist chamber culture
2015	October	JP	Diderma hemisphaericum	Litter	Moist chamber culture
2015	October	JP	Echinostelium minutum	Bark	Moist chamber culture
2015	October	JP	Stemonitis fusca	Litter	Moist chamber culture
2015	October	JP	Stemonitis fusca	Litter	Moist chamber culture
2015	October	YF	Clastoderma debaryanum	Bark	Moist chamber culture
2015	October	YF	Clastoderma debaryanum	Bark	Moist chamber culture
2015	October	YF	Clastoderma debaryanum	Bark	Moist chamber culture
2015	October	YF	Echinostelium minutum	Bark	Moist chamber culture
2015	October	YF	Echinostelium minutum	Bark	Moist chamber culture
2015	October	YF	Licea minima	Bark	Moist chamber culture
2015	October	YF	Stemonitis fusca	Litter	Moist chamber culture
2015	October	YF	Stemonitis fusca	Litter	Moist chamber culture
2015	October	YF	Arcyria cinerea	Bark	Moist chamber culture
2015	October	YF	Arcyria cinerea	Bark	Moist chamber culture
2015	October	YF	Arcyria cinerea	Bark	Moist chamber culture
2015	October	YF	Clastoderma debaryanum	Litter	Moist chamber culture
2015	October	YF	Colloderma oculatum	Bark	Moist chamber culture
2015	October	YF	Colloderma oculatum	Bark	Moist chamber culture
2015	October	YF	Colloderma oculatum	Bark	Moist chamber culture
2015	October	YF	Echinostelium minutum	Bark	Moist chamber culture
2015	October	YF	Echinostelium minutum	Bark	Moist chamber culture
2015	October	YF	Echinostelium minutum	Bark	Moist chamber culture
2015	October	YF	Licea operculata	Bark	Moist chamber culture
2015	October	YF	Licea operculata	Bark	Moist chamber culture
2015	October	YF	Licea operculata	Bark	Moist chamber culture
2015	October	YF	Stemonitis fusca	Litter	Moist chamber culture
2015	October	YF	Diderma effusum	Bark	Moist chamber culture
2015	October	YF	Diderma effusum	Bark	Moist chamber culture
2015	October	YF	Diderma effusum	Bark	Moist chamber culture
2015	October	YF	Echinostelium minutum	Bark	Moist chamber culture
2015	October	YF	Licea biforis	Bark	Moist chamber culture
2015	October	YF	Licea biforis	Bark	Moist chamber culture
2015	October	YF	Stemonitopsis reticulata	Bark	Moist chamber culture
2015	October	YF	Colloderma oculatum	Bark	Moist chamber culture
2015	October	YF	Colloderma oculatum	Bark	Moist chamber culture
2015	October	YF	Colloderma oculatum	Bark	Moist chamber culture
2015	October	YF	Cribraria microcarpa	Litter	Moist chamber culture
2015	October	PP	Colloderma oculatum	Bark	Moist chamber culture
2015	October	PP	Echinostelium minutum	Bark	Moist chamber culture
2015	October	PP	Licea minima	Bark	Moist chamber culture
2015	October	PP	Licea operculata	Bark	Moist chamber culture
2015	October	PP	Licea operculata	Bark	Moist chamber culture
2015	October	PP	Licea operculata	Bark	Moist chamber culture
2015	October	PP	Arcyria cinerea	Litter	Moist chamber culture
2015	October	PP	Clastoderma debaryanum	Bark	Moist chamber culture
2015	October	PP	Clastoderma debaryanum	Bark	Moist chamber culture
2015	October	PP	Diderma effusum	Litter	Moist chamber culture
2015	October	PP	Diderma effusum	Litter	Moist chamber culture
2015	October	PP	Diderma effusum	Litter	Moist chamber culture
2015	October	PP	Licea minima	Bark	Moist chamber culture
2015	October	PP	Stemonitopsis reticulata	Litter	Moist chamber culture
2015	October	PP	Arcyria cinerea	Litter	Moist chamber culture
2015	October	PP	Arcyria cinerea	Litter	Moist chamber culture
2015	October	PP	Arcyria denudata	Litter	Moist chamber culture
2015	October	PP	Arcyria denudata	Litter	Moist chamber culture
2015	October	PP	Arcyria denudata	Litter	Moist chamber culture
2015	October	PP	Clastoderma debaryanum	Bark	Moist chamber culture
2015	October	PP	Clastoderma debaryanum	Bark	Moist chamber culture
2015	October	PP	Echinostelium minutum	Bark	Moist chamber culture
2015	October	PP	Echinostelium minutum	Litter	Moist chamber culture
2015	October	PP	Stemonitis fusca	Litter	Moist chamber culture
2015	October	PP	Arcyria cinerea	Bark	Moist chamber culture
2015	October	PP	Arcyria cinerea	Litter	Moist chamber culture
2015	October	PP	Diderma effusum	Bark	Moist chamber culture
2015	October	PP	Arcyria cinerea	Litter	Moist chamber culture
2015	October	PP	Diderma effusum	Bark	Moist chamber culture
2015	October	PP	Diderma effusum	Bark	Moist chamber culture
2015	October	WF	Clastoderma debaryanum	Litter	Moist chamber culture
2015	October	WF	Diderma effusum	Bark	Moist chamber culture
2015	October	WF	Diderma effusum	Bark	Moist chamber culture
2015	October	WF	Colloderma oculatum	Bark	Moist chamber culture
2015	October	WF	Colloderma oculatum	Bark	Moist chamber culture
2015	October	WF	Arcyria cinerea	Litter	Moist chamber culture
2015	October	WF	Arcyria cinerea	Litter	Moist chamber culture
2015	October	WF	Clastoderma debaryanum	Bark	Moist chamber culture
2015	October	WF	Clastoderma debaryanum	Bark	Moist chamber culture
2015	October	WF	Clastoderma debaryanum	Bark	Moist chamber culture
2015	October	WF	Clastoderma debaryanum	Bark	Moist chamber culture
2015	October	WF	Colloderma oculatum	Bark	Moist chamber culture
2015	October	WF	Colloderma oculatum	Bark	Moist chamber culture
2015	October	WF	Cribraria microcarpa	Bark	Moist chamber culture
2015	October	WF	Stemonitis fusca	Litter	Moist chamber culture
2015	October	WF	Arcyria cinerea	Litter	Moist chamber culture
2015	October	WF	Clastoderma debaryanum	Litter	Moist chamber culture
2015	October	WF	Diderma effusum	Bark	Moist chamber culture
2015	October	WF	Physarum pusillum	Bark	Moist chamber culture
2015	October	OB	Clastoderma debaryanum	Bark	Moist chamber culture
2015	October	OB	Clastoderma debaryanum	Bark	Moist chamber culture
2015	October	OB	Clastoderma debaryanum	Bark	Moist chamber culture
2015	October	OB	Clastoderma debaryanum	Bark	Moist chamber culture
2015	October	OB	Cribraria microcarpa	Bark	Moist chamber culture
2015	October	OB	Echinostelium minutum	Bark	Moist chamber culture
2015	October	OB	Clastoderma debaryanum	Bark	Moist chamber culture
2015	October	OB	Collaria arcyrionema	Litter	Moist chamber culture
2015	October	OB	Colloderma oculatum	Bark	Moist chamber culture
2015	October	OB	Colloderma oculatum	Bark	Moist chamber culture
2015	October	OB	Colloderma oculatum	Bark	Moist chamber culture
2015	October	OB	Echinostelium minutum	Bark	Moist chamber culture
2015	October	OB	Echinostelium minutum	Bark	Moist chamber culture
2015	October	OB	Licea variabilis	Litter	Moist chamber culture
2015	October	OB	Stemonitis fusca	Litter	Moist chamber culture
2015	October	OB	Arcyria cinerea	Bark	Moist chamber culture
2015	October	OB	Ceratiomyxa fruticulosa	Litter	Moist chamber culture
2015	October	OB	Clastoderma debaryanum	Bark	Moist chamber culture
2015	October	OB	Colloderma oculatum	Bark	Moist chamber culture
2015	October	OB	Colloderma oculatum	Bark	Moist chamber culture
2015	October	OB	Arcyria cinerea	Litter	Moist chamber culture
2016	May	QF	Stemonitis fusca	Litter	Moist chamber culture
2016	May	QF	Stemonitopsis reticulata	Litter	Moist chamber culture
2016	May	QF	Arcyria cinerea	Litter	Moist chamber culture
2016	May	QF	Cribraria confusa	Bark	Moist chamber culture
2016	May	QF	Cribraria confusa	Bark	Moist chamber culture
2016	May	QF	Cribraria confusa	Bark	Moist chamber culture
2016	May	QF	Arcyria denudata	Litter	Moist chamber culture
2016	May	QF	Arcyria denudata	Litter	Moist chamber culture
2016	May	QF	Comatricha nigra	Bark	Moist chamber culture
2016	May	QF	Arcyria cinerea	Litter	Moist chamber culture
2016	May	JP	Arcyria cinerea	Bark	Moist chamber culture
2016	May	JP	Calomyxa metallica	Litter	Moist chamber culture
2016	May	JP	Clastoderma debaryanum	Bark	Moist chamber culture
2016	May	JP	Clastoderma debaryanum	Bark	Moist chamber culture
2016	May	JP	Clastoderma debaryanum	Bark	Moist chamber culture
2016	May	JP	Cribraria confusa	Bark	Moist chamber culture
2016	May	JP	Cribraria confusa	Bark	Moist chamber culture
2016	May	JP	Cribraria microcarpa	Bark	Moist chamber culture
2016	May	JP	Cribraria violacea	Litter	Moist chamber culture
2016	May	JP	Echinostelium minutum	Bark	Moist chamber culture
2016	May	JP	Echinostelium minutum	Bark	Moist chamber culture
2016	May	JP	Licea minima	Bark	Moist chamber culture
2016	May	JP	Licea operculata	Litter	Moist chamber culture
2016	May	JP	Physarum album	Bark	Moist chamber culture
2016	May	JP	Physarum album	Bark	Moist chamber culture
2016	May	JP	Stemonitis fusca	Bark	Moist chamber culture
2016	May	JP	Clastoderma debaryanum	Bark	Moist chamber culture
2016	May	JP	Clastoderma debaryanum	Bark	Moist chamber culture
2016	May	JP	Clastoderma debaryanum	Litter	Moist chamber culture
2016	May	JP	Cribraria confusa	Bark	Moist chamber culture
2016	May	JP	Cribraria confusa	Bark	Moist chamber culture
2016	May	JP	Arcyria cinerea	Litter	Moist chamber culture
2016	May	JP	Licea castanea	Litter	Moist chamber culture
2016	May	JP	Licea minima	Bark	Moist chamber culture
2016	May	JP	Licea minima	Bark	Moist chamber culture
2016	May	JP	Paradiacheopsis erythropodia	Bark	Moist chamber culture
2016	May	JP	Paradiacheopsis erythropodia	Bark	Moist chamber culture
2016	May	JP	Physarum bivalve	Litter	Moist chamber culture
2016	May	JP	Trichia botrytis	Bark	Moist chamber culture
2016	May	JP	Trichia botrytis	Bark	Moist chamber culture
2016	May	JP	Trichia botrytis	Bark	Moist chamber culture
2016	May	JP	Trichia favoginea	Litter	Moist chamber culture
2016	May	JP	Didymium squamulosum	Bark	Moist chamber culture
2016	May	YF	Clastoderma debaryanum	Bark	Moist chamber culture
2016	May	YF	Echinostelium minutum	Bark	Moist chamber culture
2016	May	YF	Physarum album	Bark	Moist chamber culture
2016	May	YF	Arcyria cinerea	Litter	Moist chamber culture
2016	May	YF	Clastoderma debaryanum	Bark	Moist chamber culture
2016	May	YF	Clastoderma debaryanum	Litter	Moist chamber culture
2016	May	YF	Colloderma oculatum	Bark	Moist chamber culture
2016	May	YF	Colloderma oculatum	Bark	Moist chamber culture
2016	May	YF	Colloderma oculatum	Bark	Moist chamber culture
2016	May	YF	Colloderma oculatum	Bark	Moist chamber culture
2016	May	YF	Colloderma oculatum	Bark	Moist chamber culture
2016	May	YF	Cribraria minutissima	Bark	Moist chamber culture
2016	May	YF	Cribraria minutissima	Bark	Moist chamber culture
2016	May	YF	Echinostelium minutum	Bark	Moist chamber culture
2016	May	YF	Licea operculata	Bark	Moist chamber culture
2016	May	YF	Diderma effusum	Litter	Moist chamber culture
2016	May	YF	Arcyria cinerea	Bark	Moist chamber culture
2016	May	YF	Arcyria cinerea	Bark	Moist chamber culture
2016	May	YF	Ceratiomyxa fruticulosa	Litter	Moist chamber culture
2016	May	YF	Clastoderma debaryanum	Bark	Moist chamber culture
2016	May	YF	Echinostelium minutum	Bark	Moist chamber culture
2016	May	YF	Echinostelium minutum	Bark	Moist chamber culture
2016	May	YF	Physarum album	Bark	Moist chamber culture
2016	May	YF	Physarum album	Bark	Moist chamber culture
2016	May	PP	Arcyria cinerea	Litter	Moist chamber culture
2016	May	PP	Colloderma oculatum	Bark	Moist chamber culture
2016	May	PP	Colloderma oculatum	Bark	Moist chamber culture
2016	May	PP	Colloderma oculatum	Bark	Moist chamber culture
2016	May	PP	Echinostelium minutum	Bark	Moist chamber culture
2016	May	PP	Echinostelium minutum	Bark	Moist chamber culture
2016	May	PP	Licea operculata	Bark	Moist chamber culture
2016	May	PP	Physarum melleum	Litter	Moist chamber culture
2016	May	PP	Colloderma oculatum	Bark	Moist chamber culture
2016	May	PP	Colloderma oculatum	Bark	Moist chamber culture
2016	May	PP	Colloderma oculatum	Bark	Moist chamber culture
2016	May	PP	Stemonitis fusca	Litter	Moist chamber culture
2016	May	PP	Trichia botrytis	Bark	Moist chamber culture
2016	May	PP	Arcyria cinerea	Bark	Moist chamber culture
2016	May	PP	Arcyria cinerea	Bark	Moist chamber culture
2016	May	PP	Arcyria cinerea	Litter	Moist chamber culture
2016	May	PP	Arcyria denudata	Bark	Moist chamber culture
2016	May	PP	Colloderma oculatum	Bark	Moist chamber culture
2016	May	PP	Cribraria microcarpa	Bark	Moist chamber culture
2016	May	PP	Colloderma oculatum	Bark	Moist chamber culture
2016	May	PP	Colloderma oculatum	Bark	Moist chamber culture
2016	May	PP	Cribraria minutissima	Bark	Moist chamber culture
2016	May	PP	Cribraria minutissima	Bark	Moist chamber culture
2016	May	PP	Licea operculata	Bark	Moist chamber culture
2016	May	PP	Stemonitopsis reticulata	Litter	Moist chamber culture
2016	May	WF	Clastoderma debaryanum	Bark	Moist chamber culture
2016	May	WF	Clastoderma debaryanum	Bark	Moist chamber culture
2016	May	WF	Clastoderma debaryanum	Bark	Moist chamber culture
2016	May	WF	Comatricha nigra	Litter	Moist chamber culture
2016	May	WF	Clastoderma debaryanum	Bark	Moist chamber culture
2016	May	WF	Clastoderma debaryanum	Bark	Moist chamber culture
2016	May	WF	Clastoderma debaryanum	Bark	Moist chamber culture
2016	May	WF	Clastoderma debaryanum	Bark	Moist chamber culture
2016	May	WF	Colloderma oculatum	Bark	Moist chamber culture
2016	May	WF	Stemonitis fusca	Litter	Moist chamber culture
2016	May	OB	Colloderma oculatum	Bark	Moist chamber culture
2016	May	OB	Colloderma oculatum	Bark	Moist chamber culture
2016	May	OB	Hemitrichia serpula	Litter	Moist chamber culture
2016	May	OB	Trichia botrytis	Bark	Moist chamber culture
2016	May	OB	Echinostelium minutum	Bark	Moist chamber culture
2016	May	OB	Echinostelium minutum	Bark	Moist chamber culture
2016	May	OB	Stemonitis fusca	Litter	Moist chamber culture
2016	May	OB	Arcyria cinerea	Bark	Moist chamber culture
2016	May	OB	Clastoderma debaryanum	Bark	Moist chamber culture
2016	May	OB	Clastoderma debaryanum	Bark	Moist chamber culture
2016	May	OB	Colloderma oculatum	Bark	Moist chamber culture
2016	May	OB	Clastoderma debaryanum	Bark	Moist chamber culture
2016	May	OB	Colloderma oculatum	Bark	Moist chamber culture
2016	May	OB	Colloderma oculatum	Bark	Moist chamber culture
2016	May	OB	Colloderma oculatum	Bark	Moist chamber culture
2016	May	OB	Clastoderma debaryanum	Bark	Moist chamber culture
2016	May	OB	Clastoderma debaryanum	Bark	Moist chamber culture
2016	May	OB	Clastoderma debaryanum	Bark	Moist chamber culture
2016	May	OB	Licea operculata	Bark	Moist chamber culture
2016	May	OB	Licea operculata	Bark	Moist chamber culture
2016	May	QF	Arcyria cinerea	Litter	Moist chamber culture
2016	May	JP	Licea castanea	Litter	Moist chamber culture
2016	May	JP	Arcyria cinerea	Litter	Moist chamber culture
2016	May	JP	Arcyria denudata	Litter	Moist chamber culture
2016	May	JP	Clastoderma debaryanum	Litter	Moist chamber culture
2016	May	JP	Cribraria confusa	Bark	Moist chamber culture
2016	May	JP	Arcyria cinerea	Litter	Moist chamber culture
2016	May	JP	Stemonitopsis reticulata	Litter	Moist chamber culture
2016	May	JP	Cribraria confusa	Bark	Moist chamber culture
2016	May	JP	Cribraria confusa	Bark	Moist chamber culture
2016	May	JP	Trichia botrytis	Bark	Moist chamber culture
2016	May	YF	Stemonitis fusca	Litter	Moist chamber culture
2016	May	PP	Arcyria cinerea	Litter	Moist chamber culture
2016	May	PP	Colloderma oculatum	Bark	Moist chamber culture
2016	May	PP	Colloderma oculatum	Bark	Moist chamber culture
2016	May	PP	Echinostelium minutum	Bark	Moist chamber culture
2016	May	PP	Colloderma oculatum	Bark	Moist chamber culture
2016	May	PP	Arcyria cinerea	Bark	Moist chamber culture
2016	May	WF	Arcyria cinerea	Bark	Moist chamber culture
2016	May	WF	Arcyria cinerea	Bark	Moist chamber culture
2016	May	WF	Arcyria cinerea	Bark	Moist chamber culture
2016	May	WF	Licea minima	Litter	Moist chamber culture
2016	May	WF	Hemitrichia serpula	Bark	Moist chamber culture
2016	May	WF	Arcyria cinerea	Litter	Moist chamber culture
2016	May	WF	Colloderma oculatum	Bark	Moist chamber culture
2016	May	WF	Physarum album	Bark	Moist chamber culture
2016	May	WF	Physarum album	Bark	Moist chamber culture
2016	May	WF	Trichia decipiens	Litter	Moist chamber culture
2016	May	OB	Colloderma oculatum	Bark	Moist chamber culture
2016	May	OB	Arcyria cinerea	Litter	Moist chamber culture
2016	May	OB	Arcyria denudata	Litter	Moist chamber culture
2016	May	OB	Colloderma oculatum	Bark	Moist chamber culture
2016	June	QF	Clastoderma debaryanum	Litter	Moist chamber culture
2016	June	QF	Echinostelium minutum	Litter	Moist chamber culture
2016	June	QF	Trichia botrytis	Litter	Moist chamber culture
2016	June	QF	Clastoderma debaryanum	Bark	Moist chamber culture
2016	June	QF	Clastoderma debaryanum	Litter	Moist chamber culture
2016	June	QF	Cribraria confusa	Bark	Moist chamber culture
2016	June	QF	Cribraria confusa	Bark	Moist chamber culture
2016	June	QF	Echinostelium minutum	Bark	Moist chamber culture
2016	June	QF	Physarum pusillum	Litter	Moist chamber culture
2016	June	QF	Stemonitopsis reticulata	Litter	Moist chamber culture
2016	June	QF	Stemonitopsis reticulata	Litter	Moist chamber culture
2016	June	QF	Arcyria cinerea	Litter	Moist chamber culture
2016	June	QF	Arcyria denudata	Litter	Moist chamber culture
2016	June	QF	Comatricha nigra	Bark	Moist chamber culture
2016	June	QF	Trichia botrytis	Bark	Moist chamber culture
2016	June	JP	Arcyria cinerea	Litter	Moist chamber culture
2016	June	JP	Arcyria cinerea	Litter	Moist chamber culture
2016	June	JP	Cribraria confusa	Bark	Moist chamber culture
2016	June	JP	Cribraria confusa	Bark	Moist chamber culture
2016	June	JP	Echinostelium minutum	Bark	Moist chamber culture
2016	June	JP	Echinostelium minutum	Bark	Moist chamber culture
2016	June	JP	Arcyria cinerea	Litter	Moist chamber culture
2016	June	JP	Arcyria cinerea	Litter	Moist chamber culture
2016	June	JP	Paradiacheopsis erythropodia	Bark	Moist chamber culture
2016	June	JP	Perichaena corticalis	Litter	Moist chamber culture
2016	June	JP	Stemonitopsis reticulata	Litter	Moist chamber culture
2016	June	JP	Arcyria cinerea	Bark	Moist chamber culture
2016	June	JP	Arcyria denudata	Litter	Moist chamber culture
2016	June	JP	Macbrideola scintillans	Bark	Moist chamber culture
2016	June	JP	Arcyria cinerea	Litter	Moist chamber culture
2016	June	JP	Stemonitis fusca	Bark	Moist chamber culture
2016	June	JP	Stemonitopsis reticulata	Bark	Moist chamber culture
2016	June	JP	Stemonitopsis reticulata	Litter	Moist chamber culture
2016	June	JP	Stemonitopsis reticulata	Litter	Moist chamber culture
2016	June	JP	Trichia botrytis	Bark	Moist chamber culture
2016	June	YF	Arcyria cinerea	Bark	Moist chamber culture
2016	June	YF	Arcyria cinerea	Litter	Moist chamber culture
2016	June	YF	Clastoderma debaryanum	Litter	Moist chamber culture
2016	June	YF	Arcyria cinerea	Litter	Moist chamber culture
2016	June	YF	Colloderma oculatum	Bark	Moist chamber culture
2016	June	YF	Stemonitopsis reticulata	Bark	Moist chamber culture
2016	June	YF	Arcyria cinerea	Litter	Moist chamber culture
2016	June	YF	Cribraria violacea	Litter	Moist chamber culture
2016	June	YF	Licea minima	Bark	Moist chamber culture
2016	June	YF	Stemonitis fusca	Litter	Moist chamber culture
2016	June	YF	Arcyria cinerea	Litter	Moist chamber culture
2016	June	YF	Arcyria denudata	Litter	Moist chamber culture
2016	June	YF	Clastoderma debaryanum	Litter	Moist chamber culture
2016	June	YF	Physarum album	Bark	Moist chamber culture
2016	June	YF	Arcyria cinerea	Litter	Moist chamber culture
2016	June	YF	Arcyria cinerea	Litter	Moist chamber culture
2016	June	YF	Colloderma oculatum	Bark	Moist chamber culture
2016	June	YF	Licea operculata	Bark	Moist chamber culture
2016	June	PP	Colloderma oculatum	Bark	Moist chamber culture
2016	June	PP	Echinostelium minutum	Bark	Moist chamber culture
2016	June	PP	Echinostelium minutum	Bark	Moist chamber culture
2016	June	PP	Echinostelium minutum	Bark	Moist chamber culture
2016	June	PP	Stemonitopsis reticulata	Bark	Moist chamber culture
2016	June	PP	Perichaena pedata	Bark	Moist chamber culture
2016	June	PP	Arcyria cinerea	Litter	Moist chamber culture
2016	June	PP	Clastoderma debaryanum	Litter	Moist chamber culture
2016	June	PP	Echinostelium minutum	Bark	Moist chamber culture
2016	June	PP	Echinostelium minutum	Bark	Moist chamber culture
2016	June	PP	Echinostelium minutum	Bark	Moist chamber culture
2016	June	PP	Stemonitopsis reticulata	Litter	Moist chamber culture
2016	June	WF	Arcyria cinerea	Bark	Moist chamber culture
2016	June	WF	Arcyria cinerea	Bark	Moist chamber culture
2016	June	WF	Arcyria cinerea	Litter	Moist chamber culture
2016	June	WF	Colloderma oculatum	Bark	Moist chamber culture
2016	June	WF	Colloderma oculatum	Bark	Moist chamber culture
2016	June	WF	Colloderma oculatum	Bark	Moist chamber culture
2016	June	WF	Hemitrichia serpula	Litter	Moist chamber culture
2016	June	WF	Arcyria cinerea	Litter	Moist chamber culture
2016	June	WF	Colloderma oculatum	Bark	Moist chamber culture
2016	June	WF	Colloderma oculatum	Bark	Moist chamber culture
2016	June	WF	Colloderma oculatum	Bark	Moist chamber culture
2016	June	WF	Colloderma oculatum	Bark	Moist chamber culture
2016	June	WF	Colloderma oculatum	Bark	Moist chamber culture
2016	June	WF	Colloderma oculatum	Bark	Moist chamber culture
2016	June	WF	Comatricha pulchella	Litter	Moist chamber culture
2016	June	WF	Arcyria denudata	Litter	Moist chamber culture
2016	June	WF	Clastoderma debaryanum	Bark	Moist chamber culture
2016	June	WF	Colloderma oculatum	Bark	Moist chamber culture
2016	June	WF	Colloderma oculatum	Bark	Moist chamber culture
2016	June	WF	Cribraria minutissima	Bark	Moist chamber culture
2016	June	WF	Physarum album	Bark	Moist chamber culture
2016	June	WF	Physarum album	Bark	Moist chamber culture
2016	June	WF	Physarum album	Litter	Moist chamber culture
2016	June	OB	Arcyria cinerea	Litter	Moist chamber culture
2016	June	OB	Arcyria denudata	Litter	Moist chamber culture
2016	June	OB	Colloderma oculatum	Bark	Moist chamber culture
2016	June	OB	Colloderma oculatum	Bark	Moist chamber culture
2016	June	OB	Trichia botrytis	Bark	Moist chamber culture
2016	June	OB	Arcyria cinerea	Bark	Moist chamber culture
2016	June	OB	Arcyria cinerea	Litter	Moist chamber culture
2016	June	OB	Clastoderma debaryanum	Bark	Moist chamber culture
2016	June	OB	Clastoderma debaryanum	Bark	Moist chamber culture
2016	June	OB	Colloderma oculatum	Bark	Moist chamber culture
2016	June	OB	Colloderma oculatum	Bark	Moist chamber culture
2016	June	OB	Licea operculata	Bark	Moist chamber culture
2016	June	OB	Stemonitis fusca	Litter	Moist chamber culture
2016	June	OB	Stemonitopsis reticulata	Litter	Moist chamber culture
2016	June	OB	Arcyria cinerea	Bark	Moist chamber culture
2016	June	OB	Clastoderma debaryanum	Litter	Moist chamber culture
2016	June	OB	Arcyria denudata	Litter	Moist chamber culture
2016	June	OB	Colloderma oculatum	Bark	Moist chamber culture
2016	June	OB	Colloderma oculatum	Bark	Moist chamber culture
2016	June	OB	Colloderma oculatum	Bark	Moist chamber culture
2016	June	OB	Licea variabilis	Bark	Moist chamber culture
2016	June	OB	Arcyria cinerea	Bark	Moist chamber culture
2016	July	QF	Calomyxa metallica	Bark	Moist chamber culture
2016	July	QF	Cribraria microcarpa	Litter	Moist chamber culture
2016	July	QF	Stemonitopsis reticulata	Litter	Moist chamber culture
2016	July	QF	Cribraria confusa	Bark	Moist chamber culture
2016	July	QF	Cribraria microcarpa	Bark	Moist chamber culture
2016	July	QF	Paradiacheopsis erythropodia	Bark	Moist chamber culture
2016	July	QF	Stemonitopsis reticulata	Litter	Moist chamber culture
2016	July	JP	Arcyria cinerea	Litter	Moist chamber culture
2016	July	JP	Arcyria cinerea	Litter	Moist chamber culture
2016	July	JP	Clastoderma debaryanum	Bark	Moist chamber culture
2016	July	JP	Clastoderma debaryanum	Litter	Moist chamber culture
2016	July	JP	Echinostelium minutum	Bark	Moist chamber culture
2016	July	JP	Echinostelium minutum	Bark	Moist chamber culture
2016	July	JP	Stemonitopsis reticulata	Litter	Moist chamber culture
2016	July	JP	Clastoderma debaryanum	Bark	Moist chamber culture
2016	July	JP	Clastoderma debaryanum	Bark	Moist chamber culture
2016	July	JP	Cribraria microcarpa	Bark	Moist chamber culture
2016	July	JP	Echinostelium minutum	Litter	Moist chamber culture
2016	July	JP	Physarum album	Bark	Moist chamber culture
2016	July	JP	Stemonitopsis reticulata	Litter	Moist chamber culture
2016	July	JP	Arcyria cinerea	Bark	Moist chamber culture
2016	July	JP	Arcyria cinerea	Litter	Moist chamber culture
2016	July	JP	Calomyxa metallica	Bark	Moist chamber culture
2016	July	JP	Calomyxa metallica	Bark	Moist chamber culture
2016	July	JP	Perichaena corticalis	Litter	Moist chamber culture
2016	July	JP	Physarum album	Bark	Moist chamber culture
2016	July	YF	Arcyria cinerea	Litter	Moist chamber culture
2016	July	YF	Perichaena corticalis	Litter	Moist chamber culture
2016	July	YF	Physarum melleum	Litter	Moist chamber culture
2016	July	YF	Clastoderma debaryanum	Bark	Moist chamber culture
2016	July	YF	Clastoderma debaryanum	Litter	Moist chamber culture
2016	July	YF	Colloderma oculatum	Bark	Moist chamber culture
2016	July	YF	Colloderma oculatum	Bark	Moist chamber culture
2016	July	YF	Echinostelium minutum	Bark	Moist chamber culture
2016	July	YF	Echinostelium minutum	Bark	Moist chamber culture
2016	July	YF	Perichaena corticalis	Litter	Moist chamber culture
2016	July	YF	Arcyria cinerea	Litter	Moist chamber culture
2016	July	YF	Colloderma oculatum	Bark	Moist chamber culture
2016	July	YF	Comatricha pulchella	Litter	Moist chamber culture
2016	July	YF	Diderma effusum	Litter	Moist chamber culture
2016	July	YF	Echinostelium minutum	Bark	Moist chamber culture
2016	July	YF	Licea operculata	Bark	Moist chamber culture
2016	July	YF	Licea operculata	Bark	Moist chamber culture
2016	July	YF	Physarum album	Bark	Moist chamber culture
2016	July	YF	Arcyria cinerea	Litter	Moist chamber culture
2016	July	YF	Clastoderma debaryanum	Bark	Moist chamber culture
2016	July	YF	Cribraria microcarpa	Litter	Moist chamber culture
2016	July	YF	Licea operculata	Bark	Moist chamber culture
2016	July	YF	Stemonitopsis reticulata	Litter	Moist chamber culture
2016	July	YF	Perichaena corticalis	Bark	Moist chamber culture
2016	July	YF	Perichaena corticalis	Bark	Moist chamber culture
2016	July	PP	Colloderma oculatum	Bark	Moist chamber culture
2016	July	PP	Colloderma oculatum	Bark	Moist chamber culture
2016	July	PP	Colloderma oculatum	Bark	Moist chamber culture
2016	July	PP	Cribraria microcarpa	Bark	Moist chamber culture
2016	July	PP	Cribraria microcarpa	Bark	Moist chamber culture
2016	July	PP	Arcyria cinerea	Litter	Moist chamber culture
2016	July	PP	Colloderma oculatum	Bark	Moist chamber culture
2016	July	PP	Colloderma oculatum	Bark	Moist chamber culture
2016	July	PP	Licea minima	Bark	Moist chamber culture
2016	July	PP	Licea minima	Bark	Moist chamber culture
2016	July	PP	Licea minima	Bark	Moist chamber culture
2016	July	PP	Colloderma oculatum	Bark	Moist chamber culture
2016	July	PP	Colloderma oculatum	Bark	Moist chamber culture
2016	July	PP	Colloderma oculatum	Bark	Moist chamber culture
2016	July	PP	Cribraria violacea	Litter	Moist chamber culture
2016	July	PP	Echinostelium minutum	Bark	Moist chamber culture
2016	July	PP	Diderma effusum	Litter	Moist chamber culture
2016	July	PP	Stemonitis fusca	Litter	Moist chamber culture
2016	July	PP	Arcyria cinerea	Litter	Moist chamber culture
2016	July	PP	Clastoderma debaryanum	Litter	Moist chamber culture
2016	July	PP	Colloderma oculatum	Bark	Moist chamber culture
2016	July	PP	Colloderma oculatum	Bark	Moist chamber culture
2016	July	PP	Colloderma oculatum	Bark	Moist chamber culture
2016	July	PP	Colloderma oculatum	Bark	Moist chamber culture
2016	July	PP	Comatricha pulchella	Litter	Moist chamber culture
2016	July	PP	Licea minima	Bark	Moist chamber culture
2016	July	PP	Perichaena corticalis	Litter	Moist chamber culture
2016	July	PP	Perichaena corticalis	Litter	Moist chamber culture
2016	July	WF	Colloderma oculatum	Bark	Moist chamber culture
2016	July	WF	Colloderma oculatum	Bark	Moist chamber culture
2016	July	WF	Colloderma oculatum	Bark	Moist chamber culture
2016	July	WF	Physarum album	Bark	Moist chamber culture
2016	July	WF	Arcyria denudata	Litter	Moist chamber culture
2016	July	WF	Clastoderma debaryanum	Bark	Moist chamber culture
2016	July	WF	Clastoderma debaryanum	Bark	Moist chamber culture
2016	July	WF	Clastoderma debaryanum	Bark	Moist chamber culture
2016	July	WF	Licea minima	Litter	Moist chamber culture
2016	July	WF	Arcyria cinerea	Litter	Moist chamber culture
2016	July	WF	Arcyria cinerea	Litter	Moist chamber culture
2016	July	WF	Colloderma oculatum	Bark	Moist chamber culture
2016	July	WF	Echinostelium minutum	Litter	Moist chamber culture
2016	July	WF	Arcyria cinerea	Litter	Moist chamber culture
2016	July	WF	Clastoderma debaryanum	Bark	Moist chamber culture
2016	July	WF	Clastoderma debaryanum	Bark	Moist chamber culture
2016	July	WF	Clastoderma debaryanum	Bark	Moist chamber culture
2016	July	OB	Colloderma oculatum	Bark	Moist chamber culture
2016	July	OB	Colloderma oculatum	Bark	Moist chamber culture
2016	July	OB	Diderma effusum	Litter	Moist chamber culture
2016	July	OB	Clastoderma debaryanum	Litter	Moist chamber culture
2016	July	OB	Colloderma oculatum	Bark	Moist chamber culture
2016	July	OB	Colloderma oculatum	Bark	Moist chamber culture
2016	July	OB	Colloderma oculatum	Bark	Moist chamber culture
2016	July	OB	Stemonitopsis reticulata	Litter	Moist chamber culture
2016	July	OB	Stemonitopsis reticulata	Litter	Moist chamber culture
2016	July	OB	Arcyria cinerea	Bark	Moist chamber culture
2016	July	OB	Arcyria cinerea	Litter	Moist chamber culture
2016	July	OB	Echinostelium minutum	Bark	Moist chamber culture
2016	July	OB	Stemonitis fusca	Litter	Moist chamber culture
2016	July	OB	Arcyria denudata	Litter	Moist chamber culture
2016	August	QF	Arcyria cinerea	Litter	Moist chamber culture
2016	August	QF	Collaria arcyrionema	Litter	Moist chamber culture
2016	August	QF	Trichia botrytis	Bark	Moist chamber culture
2016	August	QF	Trichia botrytis	Bark	Moist chamber culture
2016	August	QF	Trichia botrytis	Bark	Moist chamber culture
2016	August	QF	Perichaena corticalis	Litter	Moist chamber culture
2016	August	QF	Paradiacheopsis erythropodia	Bark	Moist chamber culture
2016	August	QF	Paradiacheopsis erythropodia	Bark	Moist chamber culture
2016	August	JP	Arcyria cinerea	Litter	Moist chamber culture
2016	August	JP	Clastoderma debaryanum	Bark	Moist chamber culture
2016	August	JP	Paradiacheopsis erythropodia	Bark	Moist chamber culture
2016	August	JP	Physarum album	Bark	Moist chamber culture
2016	August	JP	Clastoderma debaryanum	Bark	Moist chamber culture
2016	August	JP	Cribraria confusa	Bark	Moist chamber culture
2016	August	JP	Cribraria confusa	Bark	Moist chamber culture
2016	August	JP	Licea minima	Bark	Moist chamber culture
2016	August	JP	Arcyria cinerea	Litter	Moist chamber culture
2016	August	JP	Clastoderma debaryanum	Litter	Moist chamber culture
2016	August	JP	Physarum pusillum	Litter	Moist chamber culture
2016	August	JP	Stemonitis fusca	Litter	Moist chamber culture
2016	August	JP	Arcyria cinerea	Bark	Moist chamber culture
2016	August	JP	Arcyria cinerea	Bark	Moist chamber culture
2016	August	JP	Arcyria denudata	Litter	Moist chamber culture
2016	August	JP	Arcyria denudata	Litter	Moist chamber culture
2016	August	JP	Licea pusilla	Bark	Moist chamber culture
2016	August	JP	Macbrideola scintillans	Bark	Moist chamber culture
2016	August	JP	Macbrideola scintillans	Bark	Moist chamber culture
2016	August	JP	Paradiacheopsis erythropodia	Bark	Moist chamber culture
2016	August	JP	Paradiacheopsis fimbriata	Bark	Moist chamber culture
2016	August	JP	Trichia favoginea	Litter	Moist chamber culture
2016	August	YF	Comatricha nigra	Litter	Moist chamber culture
2016	August	YF	Clastoderma debaryanum	Bark	Moist chamber culture
2016	August	YF	Clastoderma debaryanum	Bark	Moist chamber culture
2016	August	YF	Colloderma oculatum	Bark	Moist chamber culture
2016	August	YF	Colloderma oculatum	Bark	Moist chamber culture
2016	August	YF	Colloderma oculatum	Bark	Moist chamber culture
2016	August	YF	Cribraria minutissima	Bark	Moist chamber culture
2016	August	YF	Colloderma oculatum	Bark	Moist chamber culture
2016	August	YF	Colloderma oculatum	Bark	Moist chamber culture
2016	August	YF	Colloderma oculatum	Bark	Moist chamber culture
2016	August	YF	Licea operculata	Bark	Moist chamber culture
2016	August	YF	Arcyria cinerea	Bark	Moist chamber culture
2016	August	YF	Clastoderma debaryanum	Bark	Moist chamber culture
2016	August	YF	Clastoderma debaryanum	Bark	Moist chamber culture
2016	August	YF	Colloderma oculatum	Bark	Moist chamber culture
2016	August	YF	Colloderma oculatum	Bark	Moist chamber culture
2016	August	YF	Diderma effusum	Litter	Moist chamber culture
2016	August	YF	Licea operculata	Bark	Moist chamber culture
2016	August	YF	Licea operculata	Bark	Moist chamber culture
2016	August	YF	Stemonitopsis reticulata	Litter	Moist chamber culture
2016	August	YF	Perichaena corticalis	Bark	Moist chamber culture
2016	August	PP	Colloderma oculatum	Bark	Moist chamber culture
2016	August	PP	Colloderma oculatum	Bark	Moist chamber culture
2016	August	PP	Comatricha pulchella	Litter	Moist chamber culture
2016	August	PP	Echinostelium minutum	Bark	Moist chamber culture
2016	August	PP	Licea operculata	Bark	Moist chamber culture
2016	August	PP	Licea operculata	Bark	Moist chamber culture
2016	August	PP	Stemonitopsis reticulata	Litter	Moist chamber culture
2016	August	PP	Clastoderma debaryanum	Bark	Moist chamber culture
2016	August	PP	Colloderma oculatum	Bark	Moist chamber culture
2016	August	PP	Colloderma oculatum	Bark	Moist chamber culture
2016	August	PP	Echinostelium minutum	Bark	Moist chamber culture
2016	August	PP	Licea operculata	Bark	Moist chamber culture
2016	August	PP	Hemitrichia minor	Bark	Moist chamber culture
2016	August	PP	Licea pusilla	Bark	Moist chamber culture
2016	August	PP	Diderma effusum	Bark	Moist chamber culture
2016	August	PP	Clastoderma debaryanum	Bark	Moist chamber culture
2016	August	PP	Clastoderma debaryanum	Bark	Moist chamber culture
2016	August	PP	Licea minima	Bark	Moist chamber culture
2016	August	WF	Clastoderma debaryanum	Bark	Moist chamber culture
2016	August	WF	Colloderma oculatum	Bark	Moist chamber culture
2016	August	WF	Colloderma oculatum	Bark	Moist chamber culture
2016	August	WF	Colloderma oculatum	Bark	Moist chamber culture
2016	August	WF	Echinostelium minutum	Bark	Moist chamber culture
2016	August	WF	Arcyria cinerea	Litter	Moist chamber culture
2016	August	WF	Colloderma oculatum	Bark	Moist chamber culture
2016	August	WF	Colloderma oculatum	Bark	Moist chamber culture
2016	August	WF	Colloderma oculatum	Bark	Moist chamber culture
2016	August	WF	Stemonitopsis reticulata	Litter	Moist chamber culture
2016	August	WF	Arcyria cinerea	Litter	Moist chamber culture
2016	August	WF	Clastoderma debaryanum	Bark	Moist chamber culture
2016	August	WF	Echinostelium minutum	Litter	Moist chamber culture
2016	August	WF	Clastoderma debaryanum	Bark	Moist chamber culture
2016	August	WF	Colloderma oculatum	Bark	Moist chamber culture
2016	August	WF	Colloderma oculatum	Bark	Moist chamber culture
2016	August	WF	Colloderma oculatum	Bark	Moist chamber culture
2016	August	WF	Comatricha pulchella	Litter	Moist chamber culture
2016	August	WF	Cribraria microcarpa	Bark	Moist chamber culture
2016	August	WF	Cribraria microcarpa	Bark	Moist chamber culture
2016	August	WF	Clastoderma debaryanum	Bark	Moist chamber culture
2016	August	WF	Colloderma oculatum	Bark	Moist chamber culture
2016	August	WF	Colloderma oculatum	Bark	Moist chamber culture
2016	August	WF	Echinostelium minutum	Bark	Moist chamber culture
2016	August	OB	Clastoderma debaryanum	Bark	Moist chamber culture
2016	August	OB	Colloderma oculatum	Bark	Moist chamber culture
2016	August	OB	Colloderma oculatum	Bark	Moist chamber culture
2016	August	OB	Colloderma oculatum	Bark	Moist chamber culture
2016	August	OB	Colloderma oculatum	Bark	Moist chamber culture
2016	August	OB	Licea minima	Bark	Moist chamber culture
2016	August	OB	Colloderma oculatum	Bark	Moist chamber culture
2016	August	OB	Colloderma oculatum	Bark	Moist chamber culture
2016	August	OB	Echinostelium minutum	Bark	Moist chamber culture
2016	August	OB	Echinostelium minutum	Bark	Moist chamber culture
2016	August	OB	Clastoderma debaryanum	Bark	Moist chamber culture
2016	August	OB	Colloderma oculatum	Bark	Moist chamber culture
2016	August	OB	Colloderma oculatum	Bark	Moist chamber culture
2016	August	OB	Licea operculata	Bark	Moist chamber culture
2016	August	OB	Paradiacheopsis erythropodia	Litter	Moist chamber culture
2016	September	QF	Arcyria cinerea	Litter	Moist chamber culture
2016	September	QF	Arcyria cinerea	Litter	Moist chamber culture
2016	September	QF	Arcyria cinerea	Litter	Moist chamber culture
2016	September	QF	Hemitrichia minor	Litter	Moist chamber culture
2016	September	JP	Arcyria cinerea	Litter	Moist chamber culture
2016	September	JP	Perichaena depress	Litter	Moist chamber culture
2016	September	JP	Licea minima	Bark	Moist chamber culture
2016	September	JP	Arcyria denudata	Litter	Moist chamber culture
2016	September	JP	Licea castanea	Bark	Moist chamber culture
2016	September	JP	Licea castanea	Bark	Moist chamber culture
2016	September	JP	Cribraria microcarpa	Bark	Moist chamber culture
2016	September	JP	Physarum pusillum	Litter	Moist chamber culture
2016	September	JP	Diderma effusum	Litter	Moist chamber culture
2016	September	JP	Perichaena corticalis	Litter	Moist chamber culture
2016	September	YF	Hemitrichia minor	Bark	Moist chamber culture
2016	September	YF	Arcyria denudata	Litter	Moist chamber culture
2016	September	YF	Comatricha pulchella	Bark	Moist chamber culture
2016	September	YF	Arcyria cinerea	Litter	Moist chamber culture
2016	September	YF	Colloderma oculatum	Bark	Moist chamber culture
2016	September	YF	Colloderma oculatum	Bark	Moist chamber culture
2016	September	YF	Clastoderma debaryanum	Bark	Moist chamber culture
2016	September	YF	Echinostelium minutum	Bark	Moist chamber culture
2016	September	YF	Echinostelium minutum	Bark	Moist chamber culture
2016	September	YF	Stemonitopsis reticulata	Litter	Moist chamber culture
2016	September	YF	Colloderma oculatum	Bark	Moist chamber culture
2016	September	YF	Colloderma oculatum	Bark	Moist chamber culture
2016	September	PP	Diderma effusum	Bark	Moist chamber culture
2016	September	PP	Ceratiomyxa fruticulosa	Litter	Moist chamber culture
2016	September	PP	Colloderma oculatum	Bark	Moist chamber culture
2016	September	PP	Licea operculata	Bark	Moist chamber culture
2016	September	PP	Arcyria cinerea	Litter	Moist chamber culture
2016	September	PP	Colloderma oculatum	Bark	Moist chamber culture
2016	September	PP	Colloderma oculatum	Bark	Moist chamber culture
2016	September	PP	Colloderma oculatum	Bark	Moist chamber culture
2016	September	WF	Colloderma oculatum	Bark	Moist chamber culture
2016	September	WF	Colloderma oculatum	Bark	Moist chamber culture
2016	September	WF	Physarum album	Bark	Moist chamber culture
2016	September	WF	Licea minima	Bark	Moist chamber culture
2016	September	WF	Colloderma oculatum	Bark	Moist chamber culture
2016	September	WF	Colloderma oculatum	Bark	Moist chamber culture
2016	September	WF	Colloderma oculatum	Bark	Moist chamber culture
2016	September	WF	Colloderma oculatum	Bark	Moist chamber culture
2016	September	WF	Licea minima	Bark	Moist chamber culture
2016	September	WF	Licea pusilla	Bark	Moist chamber culture
2016	September	WF	Diderma effusum	Bark	Moist chamber culture
2016	September	OB	Arcyria cinerea	Bark	Moist chamber culture
2016	September	OB	Colloderma oculatum	Bark	Moist chamber culture
2016	September	OB	Arcyria cinerea	Bark	Moist chamber culture
2016	September	OB	Colloderma oculatum	Bark	Moist chamber culture
2016	September	OB	Clastoderma debaryanum	Bark	Moist chamber culture
2016	September	OB	Colloderma oculatum	Bark	Moist chamber culture
2016	October	QF	Perichaena corticalis	Bark	Moist chamber culture
2016	October	JP	Stemonitis fusca	Litter	Moist chamber culture
2016	October	JP	Arcyria cinerea	Bark	Moist chamber culture
2016	October	JP	Physarum album	Bark	Moist chamber culture
2016	October	JP	Physarum album	Bark	Moist chamber culture
2016	October	JP	Licea minima	Litter	Moist chamber culture
2016	October	JP	Stemonitis fusca	Litter	Moist chamber culture
2016	October	JP	Arcyria cinerea	Bark	Moist chamber culture
2016	October	JP	Arcyria cinerea	Bark	Moist chamber culture
2016	October	JP	Physarum album	Bark	Moist chamber culture
2016	October	YF	Ceratiomyxa fruticulosa	Litter	Moist chamber culture
2016	October	YF	Clastoderma debaryanum	Bark	Moist chamber culture
2016	October	YF	Colloderma oculatum	Bark	Moist chamber culture
2016	October	YF	Colloderma oculatum	Bark	Moist chamber culture
2016	October	YF	Clastoderma debaryanum	Bark	Moist chamber culture
2016	October	YF	Clastoderma debaryanum	Bark	Moist chamber culture
2016	October	YF	Arcyria cinerea	Litter	Moist chamber culture
2016	October	YF	Colloderma oculatum	Bark	Moist chamber culture
2016	October	YF	Diderma effusum	Litter	Moist chamber culture
2016	October	YF	Licea minima	Bark	Moist chamber culture
2016	October	YF	Licea operculata	Bark	Moist chamber culture
2016	October	YF	Licea operculata	Bark	Moist chamber culture
2016	October	YF	Physarum album	Bark	Moist chamber culture
2016	October	YF	Physarum album	Bark	Moist chamber culture
2016	October	YF	Physarum album	Bark	Moist chamber culture
2016	October	YF	Diderma effusum	Bark	Moist chamber culture
2016	October	YF	Diderma effusum	Bark	Moist chamber culture
2016	October	YF	Echinostelium minutum	Litter	Moist chamber culture
2016	October	YF	Perichaena corticalis	Litter	Moist chamber culture
2016	October	PP	Arcyria cinerea	Bark	Moist chamber culture
2016	October	PP	Clastoderma debaryanum	Litter	Moist chamber culture
2016	October	PP	Arcyria cinerea	Litter	Moist chamber culture
2016	October	PP	Arcyria cinerea	Litter	Moist chamber culture
2016	October	PP	Colloderma oculatum	Bark	Moist chamber culture
2016	October	PP	Colloderma oculatum	Bark	Moist chamber culture
2016	October	PP	Perichaena corticalis	Bark	Moist chamber culture
2016	October	PP	Perichaena corticalis	Bark	Moist chamber culture
2016	October	PP	Arcyria cinerea	Litter	Moist chamber culture
2016	October	PP	Colloderma oculatum	Bark	Moist chamber culture
2016	October	PP	Cribraria microcarpa	Bark	Moist chamber culture
2016	October	PP	Diderma effusum	Litter	Moist chamber culture
2016	October	WF	Arcyria cinerea	Litter	Moist chamber culture
2016	October	WF	Arcyria cinerea	Bark	Moist chamber culture
2016	October	WF	Arcyria cinerea	Litter	Moist chamber culture
2016	October	WF	Clastoderma debaryanum	Litter	Moist chamber culture
2016	October	WF	Licea operculata	Bark	Moist chamber culture
2016	October	WF	Physarum album	Bark	Moist chamber culture
2016	October	WF	Colloderma oculatum	Bark	Moist chamber culture
2016	October	WF	Colloderma oculatum	Bark	Moist chamber culture
2016	October	WF	Colloderma oculatum	Bark	Moist chamber culture
2016	October	WF	Licea operculata	Bark	Moist chamber culture
2016	October	WF	Arcyria cinerea	Litter	Moist chamber culture
2016	October	WF	Clastoderma debaryanum	Bark	Moist chamber culture
2016	October	WF	Clastoderma debaryanum	Bark	Moist chamber culture
2016	October	WF	Colloderma oculatum	Bark	Moist chamber culture
2016	October	WF	Colloderma oculatum	Bark	Moist chamber culture
2016	October	WF	Physarum album	Bark	Moist chamber culture
2016	October	WF	Physarum album	Bark	Moist chamber culture
2016	October	OB	Arcyria cinerea	Bark	Moist chamber culture
2016	October	OB	Clastoderma debaryanum	Bark	Moist chamber culture
2016	October	OB	Cribraria microcarpa	Bark	Moist chamber culture
2016	October	OB	Ceratiomyxa fruticulosa	Litter	Moist chamber culture
2016	October	OB	Clastoderma debaryanum	Bark	Moist chamber culture
2016	October	OB	Echinostelium minutum	Bark	Moist chamber culture
2016	October	OB	Echinostelium minutum	Bark	Moist chamber culture
2016	October	OB	Physarum album	Litter	Moist chamber culture
2016	October	OB	Stemonitis fusca	Litter	Moist chamber culture
2016	October	OB	Arcyria denudata	Litter	Moist chamber culture
2016	October	OB	Clastoderma debaryanum	Litter	Moist chamber culture
2016	October	OB	Trichia botrytis	Bark	Moist chamber culture
2015	October	PP	Hemitrichia serpula	Rotten wood	Field collection
2015	October	PP	Hemitrichia serpula	Rotten wood	Field collection
2015	October	PP	Trichia lutescens	Rotten wood	Field collection
2015	May	QF	Lycogala exiguum	Rotten wood	Field collection
2015	May	QF	Lycogala exiguum	Rotten wood	Field collection
2015	May	JP	Lycogala exiguum	Rotten wood	Field collection
2015	May	JP	Lycogala exiguum	Rotten wood	Field collection
2015	May	JP	Lycogala exiguum	Rotten wood	Field collection
2015	May	JP	Lycogala exiguum	Rotten wood	Field collection
2015	May	JP	Lycogala exiguum	Rotten wood	Field collection
2015	May	JP	Lycogala exiguum	Rotten wood	Field collection
2015	May	YF	Lycogala exiguum	Rotten wood	Field collection
2015	May	YF	Lycogala exiguum	Rotten wood	Field collection
2015	May	YF	Lycogala exiguum	Rotten wood	Field collection
2015	May	YF	Lycogala exiguum	Rotten wood	Field collection
2015	May	YF	Lycogala exiguum	Rotten wood	Field collection
2015	May	WF	Lycogala exiguum	Rotten wood	Field collection
2015	May	OB	Lycogala exiguum	Rotten wood	Field collection
2015	June	QF	Lycogala exigum	Rotten wood	Field collection
2015	June	YF	Didymium minus	Ground liter	Field collection
2015	June	YF	Didymium minus	Ground liter	Field collection
2015	July	QF	Stemonitis axifera	Rotten wood	Field collection
2015	July	JP	Ceratiomyxa fruticulosa	Ground liter	Field collection
2015	July	JP	Stemonitis axifera	Ground liter	Field collection
2015	July	JP	Physarum viride	Rotten wood	Field collection
2015	July	YF	Physarum melleum	Rotten wood	Field collection
2015	July	YF	Physarum viride	Rotten wood	Field collection
2015	July	YF	Ceratiomyxa fruticulosa	Ground liter	Field collection
2015	July	YF	Physarum flavicomum	Rotten wood	Field collection
2015	July	YF	Physarum flavicomum	Rotten wood	Field collection
2015	July	YF	Physarum flavicomum	Rotten wood	Field collection
2015	July	YF	Cribraria violacea	Rotten wood	Field collection
2015	July	YF	Hemitrichia serpula	Rotten wood	Field collection
2015	July	YF	Hemitrichia serpula	Rotten wood	Field collection
2015	July	YF	Periachaena depressa	Rotten wood	Field collection
2015	July	YF	Periachaena depressa	Rotten wood	Field collection
2015	July	YF	Stemonitis pallida	Rotten wood	Field collection
2015	July	PP	Lycogala exiguum	Rotten wood	Field collection
2015	July	PP	Ceratiomyxa fruticulosa	Ground liter	Field collection
2015	July	PP	Hemitrichia calyculata	Rotten wood	Field collection
2015	July	PP	Hemitrichia calyculata	Rotten wood	Field collection
2015	July	PP	Hemitrichia calyculata	Rotten wood	Field collection
2015	July	PP	Hemitrichia calyculata	Rotten wood	Field collection
2015	July	PP	Hemitrichia calyculata	Rotten wood	Field collection
2015	July	WF	Ceratiomyxa fruticulosa	Ground liter	Field collection
2015	July	WF	Didymium minus	Rotten wood	Field collection
2015	July	WF	Physarum viride	Rotten wood	Field collection
2015	July	OB	Ceratiomyxa fruticulosa	Ground liter	Field collection
2015	July	OB	Lycogala exiguum	Rotten wood	Field collection
2015	July	QF	Arcyria cinerea	Rotten wood	Field collection
2015	July	QF	Arcyria denudata	Rotten wood	Field collection
2015	July	QF	Stemonitis fusca	Rotten wood	Field collection
2015	July	QF	Stemonitis fusca	Rotten wood	Field collection
2015	July	JP	Arcyria denudata	Rotten wood	Field collection
2015	July	JP	Stemonitis smithii	Rotten wood	Field collection
2015	July	JP	Stemonitis smithii	Rotten wood	Field collection
2015	July	JP	Dictydium cancellatum	Rotten wood	Field collection
2015	July	WF	Lycogala exigum	Rotten wood	Field collection
2015	July	WF	Hemitrichia calyculata	Rotten wood	Field collection
2015	July	OB	Physarum globuliferum	Rotten wood	Field collection
2015	July	OB	Physarum globuliferum	Rotten wood	Field collection
2015	August	YF	Diderma effusum	Ground liter	Field collection
2015	August	YF	Diderma effusum	Ground liter	Field collection
2015	August	YF	Didymium iridis	Rotten wood	Field collection
2015	August	YF	Didymium iridis	Rotten wood	Field collection
2016	June	YF	Cerationmyxa fruticulosa	Rotten wood	Field collection
2016	June	YF	Lycogala exiguum	Rotten wood	Field collection
2016	June	YF	Lycogala exiguum	Rotten wood	Field collection
2016	June	PP	Cerationmyxa fruticulosa	Rotten wood	Field collection
2016	June	PP	Cribraria aurantiaca	Rotten wood	Field collection
2016	June	PP	Lycogala exiguum	Rotten wood	Field collection
2016	June	PP	Cribraria aurantiaca	Rotten wood	Field collection
2016	June	PP	Cribraria aurantiaca	Rotten wood	Field collection
2016	June	PP	Cribraria aurantiaca	Rotten wood	Field collection
2016	June	WF	Cerationmyxa fruticulosa	Ground liter	Field collection
2016	June	OB	Cerationmyxa fruticulosa	Rotten wood	Field collection
2016	June	OB	Lycogala exiguum	Rotten wood	Field collection
2016	June	OB	Lycogala exiguum	Rotten wood	Field collection
2016	June	OB	Didymium minus	Rotten wood	Field collection
2016	June	OB	Didymium minus	Ground liter	Field collection
2016	June	OB	Hemitrichia calyculata	Rotten wood	Field collection
2016	May	WF	Hemitrichia serpula	Rotten wood	Field collection
2016	July	QF	Arcyria cinerea	Rotten wood	Field collection
2016	July	QF	Arcyria cinerea	Rotten wood	Field collection
2016	July	QF	Arcyria cinerea	Rotten wood	Field collection
2016	July	QF	Arcyria cinerea	Rotten wood	Field collection
2016	July	QF	Arcyria denudata	Rotten wood	Field collection
2016	July	QF	Hemitrichia calyculata	Ground liter	Field collection
2016	July	QF	Physarum album	Rotten wood	Field collection
2016	July	QF	Physarum album	Rotten wood	Field collection
2016	July	QF	Physarum viride	Rotten wood	Field collection
2016	July	QF	Stemonitis axifera	Rotten wood	Field collection
2016	July	QF	Stemonitis smithii	Rotten wood	Field collection
2016	July	QF	Physarum flavicomum	Rotten wood	Field collection
2016	July	QF	Stemonitis axifera	Rotten wood	Field collection
2016	July	QF	Stemonitis axifera	Rotten wood	Field collection
2016	July	QF	Stemonitis smithii	Rotten wood	Field collection
2016	July	QF	Physarum flavicomum	Rotten wood	Field collection
2016	July	QF	Stemonitis smithii	Rotten wood	Field collection
2016	July	JP	Cerationmyxa fruticulosa	Rotten wood	Field collection
2016	July	JP	Cribraria aurantiaca	Rotten wood	Field collection
2016	July	JP	Collaria arcyrionema	Rotten wood	Field collection
2016	July	JP	Collaria arcyrionema	Rotten wood	Field collection
2016	July	JP	Dictydium cancellatum	Rotten wood	Field collection
2016	July	JP	Arcyria cinerea	Rotten wood	Field collection
2016	July	JP	Arcyria obvelata	Rotten wood	Field collection
2016	July	JP	Arcyria obvelata	Rotten wood	Field collection
2016	July	JP	Stemonitis smithii	Rotten wood	Field collection
2016	July	JP	Arcyria obvelata	Rotten wood	Field collection
2016	July	JP	Lycogala exiguum	Rotten wood	Field collection
2016	July	JP	Stemonitis smithii	Ground liter	Field collection
2016	July	JP	Tubifera ferruginosa	Rotten wood	Field collection
2016	July	JP	Trichia botrytis	Rotten wood	Field collection
2016	July	YF	Arcyria obvelata	Rotten wood	Field collection
2016	July	YF	Collaria arcyrionema	Rotten wood	Field collection
2016	July	YF	Physarum viride	Rotten wood	Field collection
2016	July	YF	Arcyria cinerea	Rotten wood	Field collection
2016	July	YF	Cribraria aurantiaca	Rotten wood	Field collection
2016	July	YF	Hemitrichia calyculata	Rotten wood	Field collection
2016	July	YF	Hemitrichia calyculata	Rotten wood	Field collection
2016	July	YF	Hemitrichia calyculata	Rotten wood	Field collection
2016	July	YF	Lycogala exiguum	Rotten wood	Field collection
2016	July	YF	Stemonitis smithii	Rotten wood	Field collection
2016	July	YF	Stemonitis smithii	Rotten wood	Field collection
2016	July	YF	Diderma effusum	Ground liter	Field collection
2016	July	YF	Stemonitis smithii	Rotten wood	Field collection
2016	July	YF	Stemonitis smithii	Rotten wood	Field collection
2016	July	YF	Stemonitis axifera	Rotten wood	Field collection
2016	July	PP	Arcyria cinerea	Rotten wood	Field collection
2016	July	PP	Arcyria cinerea	Rotten wood	Field collection
2016	July	PP	Arcyria cinerea	Rotten wood	Field collection
2016	July	PP	Lycogala exiguum	Rotten wood	Field collection
2016	July	PP	Physarum album	Rotten wood	Field collection
2016	July	PP	Physarum album	Rotten wood	Field collection
2016	July	PP	Tubifera ferruginosa	Rotten wood	Field collection
2016	July	PP	Cribraria aurantiaca	Rotten wood	Field collection
2016	July	PP	Cribraria aurantiaca	Rotten wood	Field collection
2016	July	PP	Stemonitis smithii	Rotten wood	Field collection
2016	July	PP	Lycogala exiguum	Rotten wood	Field collection
2016	July	PP	Physarum viride	Rotten wood	Field collection
2016	July	PP	Stemonitis smithii	Rotten wood	Field collection
2016	July	PP	Cerationmyxa fruticulosa	Rotten wood	Field collection
2016	July	PP	Dictydium cancellatum	Rotten wood	Field collection
2016	July	PP	Dictydium cancellatum	Rotten wood	Field collection
2016	July	PP	Dictydium cancellatum	Rotten wood	Field collection
2016	July	PP	Lycogala exiguum	Rotten wood	Field collection
2016	July	PP	Physarum viride	Rotten wood	Field collection
2016	July	PP	Physarum viride	Rotten wood	Field collection
2016	July	PP	Physarum viride	Rotten wood	Field collection
2016	July	PP	Tubifera ferruginosa	Rotten wood	Field collection
2016	July	PP	Dictydium cancellatum	Rotten wood	Field collection
2016	July	PP	Dictydium cancellatum	Rotten wood	Field collection
2016	July	PP	Lycogala exiguum	Rotten wood	Field collection
2016	July	PP	Tubifera ferruginosa	Rotten wood	Field collection
2016	July	WF	Cerationmyxa fruticulosa	Ground liter	Field collection
2016	July	WF	Collaria arcyrionema	Ground liter	Field collection
2016	July	WF	Diderma effusum	Ground liter	Field collection
2016	July	WF	Physarum penetrale	Ground liter	Field collection
2016	July	WF	Physarum penetrale	Rotten wood	Field collection
2016	July	WF	Physarum penetrale	Rotten wood	Field collection
2016	July	WF	Physarum penetrale	Ground liter	Field collection
2016	July	WF	Physarum penetrale	Ground liter	Field collection
2016	July	WF	Physarum viride	Ground liter	Field collection
2016	July	WF	Arcyria cinerea	Rotten wood	Field collection
2016	July	WF	Physarum viride	Rotten wood	Field collection
2016	July	WF	Stemonitis smithii	Rotten wood	Field collection
2016	July	WF	Stemonitis smithii	Rotten wood	Field collection
2016	July	WF	Physarum penetrale	Ground liter	Field collection
2016	July	WF	Cribraria microcarpa	Ground liter	Field collection
2016	July	WF	Cribraria microcarpa	Ground liter	Field collection
2016	July	WF	Cribraria microcarpa	Rotten wood	Field collection
2016	July	WF	Cribraria microcarpa	Rotten wood	Field collection
2016	July	WF	Physarum penetrale	Ground liter	Field collection
2016	July	WF	Physarum penetrale	Ground liter	Field collection
2016	July	OB	Cerationmyxa fruticulosa	Rotten wood	Field collection
2016	July	OB	Cerationmyxa fruticulosa	Rotten wood	Field collection
2016	July	OB	Physarum viride	Ground liter	Field collection
2016	July	OB	Arcyria cinerea	Rotten wood	Field collection
2016	July	OB	Arcyria cinerea	Rotten wood	Field collection
2016	July	OB	Arcyria obvelata	Rotten wood	Field collection
2016	July	OB	Arcyria obvelata	Rotten wood	Field collection
2016	July	OB	Dictydium cancellatum	Rotten wood	Field collection
2016	July	OB	Dictydium cancellatum	Rotten wood	Field collection
2016	July	OB	Lycogala exiguum	Rotten wood	Field collection
2016	July	OB	Trichia erecta	Rotten wood	Field collection
2016	July	OB	Dictydium cancellatum	Rotten wood	Field collection
2016	July	OB	Cribraria aurantiaca	Rotten wood	Field collection
2016	July	OB	Reticularia lycoperdon	Rotten wood	Field collection
2016	July	OB	Reticularia lycoperdon	Rotten wood	Field collection
2016	July	OB	Arcyria obvelata	Rotten wood	Field collection
2016	July	OB	Cribraria microcarpa	Rotten wood	Field collection
2016	July	OB	Physarum album	Rotten wood	Field collection
2016	July	OB	Stemonitis smithii	Rotten wood	Field collection
2016	August	QF	Arcyria cinerea	Rotten wood	Field collection
2016	August	QF	Hemitrichia calyculata	Rotten wood	Field collection
2016	August	QF	Hemitrichia serpula	Rotten wood	Field collection
2016	August	QF	Hemitrichia serpula	Rotten wood	Field collection
2016	August	QF	Arcyria cinerea	Rotten wood	Field collection
2016	August	QF	Hemitrichia calyculata	Rotten wood	Field collection
2016	August	QF	Arcyria cinerea	Rotten wood	Field collection
2016	August	JP	Arcyria cinerea	Rotten wood	Field collection
2016	August	JP	Physarum melleum	Rotten wood	Field collection
2016	August	YF	Arcyria denudata	Rotten wood	Field collection
2016	August	YF	Cerationmyxa fruticulosa	Rotten wood	Field collection
2016	August	YF	Arcyria cinerea	Rotten wood	Field collection
2016	August	YF	Hemitrichia calyculata	Rotten wood	Field collection
2016	August	YF	Hemitrichia calyculata	Rotten wood	Field collection
2016	August	PP	Cerationmyxa fruticulosa	Rotten wood	Field collection
2016	August	PP	Lycogala exiguum	Rotten wood	Field collection
2016	August	PP	Arcyria cinerea	Rotten wood	Field collection
2016	August	PP	Dictydium cancellatum	Rotten wood	Field collection
2016	August	PP	Dictydium cancellatum	Rotten wood	Field collection
2016	August	WF	Stemonitis axifera	Rotten wood	Field collection
2016	August	WF	Stemonitis fusca	Rotten wood	Field collection
2016	August	WF	Stemonitis fusca	Rotten wood	Field collection
2016	August	WF	Trichia contorta	Rotten wood	Field collection
2016	August	WF	Trichia lutescens	Rotten wood	Field collection
2016	August	OB	Lycogala exiguum	Rotten wood	Field collection
2016	August	OB	Trichia botrytis	Ground liter	Field collection
2016	August	OB	Trichia botrytis	Ground liter	Field collection
2016	August	OB	Comatricha nigra	Rotten wood	Field collection
2016	August	OB	Cerationmyxa fruticulosa	Rotten wood	Field collection
2016	August	OB	Lycogala exiguum	Rotten wood	Field collection
2016	August	QF	Arcyria cinerea	Rotten wood	Field collection
2016	August	QF	Arcyria denudata	Rotten wood	Field collection
2016	August	QF	Hemitrichia serpula	Rotten wood	Field collection
2016	August	JP	Arcyria denudata	Rotten wood	Field collection
2016	August	JP	Comatricha nigra	Rotten wood	Field collection
2016	August	JP	Physarum album	Rotten wood	Field collection
2016	August	JP	Physarum roseum	Rotten wood	Field collection
2016	August	JP	Arcyria major	Rotten wood	Field collection
2016	August	JP	Physarum roseum	Rotten wood	Field collection
2016	August	JP	Cribraria aurantiaca	Rotten wood	Field collection
2016	August	JP	Cribraria aurantiaca	Rotten wood	Field collection
2016	August	JP	Physarum album	Rotten wood	Field collection
2016	August	WF	Diderma effusum	Rotten wood	Field collection
2016	August	WF	Cribraria aurantiaca	Rotten wood	Field collection
2016	August	WF	Cribraria aurantiaca	Rotten wood	Field collection
2016	August	WF	Cribraria aurantiaca	Rotten wood	Field collection
2016	August	WF	Diderma hemisphaericum	Ground liter	Field collection
2016	September	QF	Lycogala exiguum	Rotten wood	Field collection
2016	September	JP	Lycogala exiguum	Rotten wood	Field collection
2016	September	PP	Amaurochaete atra	Rotten wood	Field collection
