# Supplementary material for: Distribution and diversity of myxomycetes in Tiantangzhai National Forest Park, China
Source: PeerJ. 2021 Aug 25;9:e12059. doi: 10.7717/peerj.12059 (PMC8401731; doi:10.7717/peerj.12059)
Supplement: Supplemental Information 2 [file peerj-09-12059-s002.xlsx]

## Sheet: Sheet1
Supplemental data 2 Relative abundance of myxomycetes divided by forest type (DBF: deciduous broad-leaved forest; CBMF: coniferous broad-leaved mixed forest; CF: coniferous forest) and month (May: May; Jun: June; Jul: July; Aug: August; Sep: September; Oct: October)
Species	DBF	CBMF	CF	May	Jun	Jul	Aug	Sep	Oct
Amaurochaete atra	0	0.151669	0	0	0	0	0	0.151669	0
Arcyria cinerea	3.53895	4.49952	4.34785	1.56725	3.1345	3.33672	2.37615	0.55612	1.41558
Arcyria denudata	1.26391	0.657233	0.808902	0.353895	0.657233	0.55612	0.657233	0.252782	0.252782
Arcyria major	0.151669	0	0	0	0	0	0.151669	0	0
Arcyria obvelata	0.455007	0.151669	0.455007	0	0	1.06168	0	0	0
Calomyxa metallica	0.202225	0.202225	0	0.0505564	0	0.252782	0.101113	0	0
Ceratiomyxa fruticulosa	0.353895	1.21335	1.31447	0.0505564	0.606676	1.51669	0.455007	0.0505564	0.202225
Clastoderma debaryanum	1.1628	3.38728	5.20731	1.9717	1.1628	1.66836	2.57838	0.859458	1.51669
Collaria arcyrionema	0.353895	0.151669	0.202225	0	0	0.606676	0.0505564	0	0.0505564
Colloderma oculatum	0	6.06676	6.26899	2.62893	1.87059	2.47726	2.22448	1.76947	1.36502
Comatricha aequalis	0	0.0505564	0	0	0	0	0.0505564	0	0
Comatricha nigra	0.303338	0.0505564	0.202225	0.101113	0.0505564	0	0.404451	0	0
Comatricha pulchella	0	0.252782	0.151669	0	0.101113	0.101113	0.101113	0.101113	0
Cribraria aurantiaca	0.455007	1.06168	0.606676	0	0.606676	0.758346	0.758346	0	0
Cribraria confusa	1.11224	0	0	0.657233	0.303338	0.0505564	0.101113	0	0
Cribraria microcarpa	0.353895	0.657233	1.11224	0.101113	0	1.11224	0.505564	0.101113	0.303338
Cribraria minutissima	0	0.353895	0.0505564	0.202225	0.151669	0	0.0505564	0	0
Cribraria violacea	0.0505564	0.252782	0	0.0505564	0.0505564	0.202225	0	0	0
Diachea splendens	0.0505564	0	0	0	0	0	0	0	0.0505564
Diachea subsessilis	0.0505564	0.0505564	0	0	0	0	0.0505564	0	0.0505564
Dictydium cancellatum	0.303338	1.06168	0.455007	0	0	1.51669	0.303338	0	0
Diderma effusum	0.202225	2.52782	0.707789	0.353895	0.758346	0.657233	0.606676	0.202225	0.859458
Diderma hemisphaericum	0.0505564	0	0.151669	0	0	0	0.151669	0	0.0505564
Didymium clavus	0.0505564	0	0	0	0	0	0.0505564	0	0
Didymium iridis	0	0.303338	0	0	0	0	0.303338	0	0
Didymium melanospermum	0.0505564	0	0	0	0	0	0	0.0505564	0
Didymium minus	0.0505564	0.303338	0.455007	0	0.657233	0.151669	0	0	0
Didymium squamulosum	0.0505564	0.0505564	0	0.0505564	0.0505564	0	0	0	0
Echinostelium minutum	0.657233	2.42671	2.37615	0.657233	1.26391	1.56725	0.960571	0.202225	0.808902
Hemitrichia calyculata	0.455007	1.51669	0.303338	0	0.151669	1.51669	0.606676	0	0
Hemitrichia minor	0.0505564	0.101113	0	0	0	0	0.0505564	0.101113	0
Hemitrichia serpula	0.455007	0.657233	0.303338	0.303338	0.0505564	0.303338	0.455007	0	0.303338
Licea biforis	0.0505564	0.202225	0	0.0505564	0	0.0505564	0.0505564	0	0.101113
Licea castanea	0.353895	0.0505564	0	0.101113	0	0	0.0505564	0.151669	0.101113
Licea kleistobolus	0	0.0505564	0	0	0.0505564	0	0	0	0
Licea minima	0.303338	0.657233	0.252782	0.303338	0.0505564	0.252782	0.202225	0.151669	0.252782
Licea operculata	0.252782	2.12337	1.11224	0.455007	0.101113	0.505564	1.26391	0.657233	0.505564
Licea pedicellata	0.202225	0	0	0	0.0505564	0.0505564	0.101113	0	0
Licea pusilla	0.0505564	0.0505564	0.0505564	0	0	0	0.101113	0.0505564	0
Licea variabilis	0	0	0.101113	0	0.0505564	0	0	0	0.0505564
Lycogala exigum	1.82003	2.27504	1.36502	2.27504	0.910015	1.51669	0.455007	0.303338	0
Macbrideola scintillans	0.404451	0	0	0.252782	0.0505564	0	0.101113	0	0
Paradiacheopsis erythropodia	0.404451	0.202225	0.252782	0.101113	0.0505564	0.252782	0.404451	0.0505564	0
Paradiacheopsis fimbriata	0.0505564	0.0505564	0	0	0	0	0.101113	0	0
Perichaena corticalis	0.505564	1.06168	0.101113	0.202225	0.202225	0.505564	0.404451	0.151669	0.202225
Perichaena depressa	0.0505564	0.303338	0	0	0	0.303338	0	0.0505564	0
Perichaena pedata	0	0.0505564	0	0	0.0505564	0	0	0	0
Physarum album	1.11224	0.859458	0.758346	0.404451	0.303338	0.960571	0.404451	0.151669	0.505564
Physarum bivalve	0.0505564	0	0	0.0505564	0	0	0	0	0
Physarum cinereum	0	0.0505564	0	0	0	0.0505564	0	0	0
Physarum flavicomum	0.303338	0.455007	0	0	0	0.758346	0	0	0
Physarum globuliferum	0	0	0.303338	0	0	0.303338	0	0	0
Physarum lateritium	0.0505564	0	0	0	0	0	0	0	0.0505564
Physarum melleum	0.202225	0.252782	0	0.0505564	0	0.202225	0.202225	0	0
Physarum nucleatum	0.0505564	0	0	0	0	0.0505564	0	0	0
Physarum oblatum	0	0	0.0505564	0	0	0	0.0505564	0	0
Physarum penetrale	0	0	1.21335	0	0	1.21335	0	0	0
Physarum pusillum	0.202225	0.0505564	0.101113	0	0.101113	0.101113	0.0505564	0.0505564	0.0505564
Physarum roseum	0.303338	0	0	0	0	0	0.303338	0	0
Physarum viride	0.303338	0.910015	0.606676	0	0	1.82003	0	0	0
Reticularia lycoperdon	0	0	0.303338	0	0	0.303338	0	0	0
Stemonitis axifera	0.758346	0.151669	0.151669	0	0	0.910015	0.151669	0	0
Stemonitis fusca	1.31447	0.55612	0.707789	0.303338	0.303338	0.505564	0.707789	0.101113	0.657233
Stemonitis pallida	0	0.151669	0	0	0	0.151669	0	0	0
Stemonitis smithii	1.06168	0.910015	0.455007	0	0	2.42671	0	0	0
Stemonitopsis reticulata	0.707789	0.505564	0.252782	0.151669	0.505564	0.404451	0.202225	0.0505564	0.151669
Trichia botrytis	0.707789	0.455007	0.55612	0.303338	0.202225	0.202225	0.910015	0.0505564	0.0505564
Trichia contorta	0	0	0.151669	0	0	0	0.151669	0	0
Trichia decipiens	0	0	0.0505564	0.0505564	0	0	0	0	0
Trichia erecta	0	0	0.151669	0	0	0.151669	0	0	0
Trichia favoginea	0.202225	0	0	0.0505564	0.101113	0	0.0505564	0	0
Trichia lutescens	0	0.151669	0.151669	0	0	0	0.151669	0	0.151669
Tubifera ferruginosa	0.151669	0.455007	0	0	0	0.606676	0	0	0
