# Supplementary material for: Distribution and diversity of myxomycetes in Tiantangzhai National Forest Park, China
Source: PeerJ. 2021 Aug 25;9:e12059. doi: 10.7717/peerj.12059 (PMC8401731; doi:10.7717/peerj.12059)
Supplement: Supplemental Information 3 [file peerj-09-12059-s003.xlsx]

## Sheet: Sheet1
Supplemental data 3 ANOVA results of species richness (S) and Shannon diversity (H') of myxomycetes obtained from samples of bark and litter with the moist chamber culture technique, and field collections analyzed for variation among sampling sites, forest types, and months
Factors	Methods	α-diversities	Groups	Average	Standard deviation	Standard error
site	MC-bark	Species richness	QF	4.75	1.5	0.75
			JP	11.2	2.77489	1.24097
			YF	11	2.73861	1.22474
			PP	10.4	1.67332	0.748331
			WF	8.4	1.67332	0.748331
			OB	6.4	1.14017	0.509902
		Shannon diversity	QF	1.37675	0.424242	0.212121
			JP	2.224	0.228586	0.102227
			YF	2.0588	0.156567	0.070019
			PP	1.9442	0.194396	0.086936
			WF	1.6702	0.160856	0.071937
			OB	1.5764	0.127862	0.057182
	MC-litter	Species richness	QF	5.5	2.51661	1.25831
			JP	8.8	1.48324	0.663325
			YF	8.2	2.28035	1.0198
			PP	6.4	1.51658	0.678233
			WF	5.6	1.14017	0.509902
			OB	6.2	1.64317	0.734847
		Shannon diversity	QF	1.51625	0.489701	0.24485
			JP	1.9884	0.177945	0.079579
			YF	1.935	0.250871	0.112193
			PP	1.6048	0.306178	0.136927
			WF	1.42	0.277945	0.124301
			OB	1.6344	0.307185	0.137377
	FC	Species richness	QF	5.4	1.94936	0.87178
			JP	6.2	2.28035	1.0198
			YF	6.8	1.30384	0.583095
			PP	7	1	0.447214
			WF	6.8	2.48998	1.11355
			OB	6.4	1.94936	0.87178
		Shannon diversity	QF	1.5718	0.337692	0.151021
			JP	1.7182	0.397729	0.17787
			YF	1.8172	0.237813	0.106353
			PP	1.8484	0.136919	0.061232
			WF	1.8228	0.379809	0.169856
			OB	1.774	0.280882	0.125614
Forest type	MC-bark	Species richness	DBF	8.33333	4.03113	1.34371
			CBMF	10.7	2.16282	0.683943
			CF	7.4	1.7127	0.541603
		Shannon diversity	DBF	1.84744	0.54131	0.180437
			CBMF	2.0015	0.177026	0.055981
			CF	1.6233	0.145637	0.046054
	MC-litter	Species richness	DBF	7.33333	2.54951	0.849837
			CBMF	7.3	2.05751	0.650641
			CF	5.9	1.37032	0.433333
		Shannon diversity	DBF	1.77856	0.409492	0.136497
			CBMF	1.7699	0.316106	0.099961
			CF	1.5272	0.2984	0.094362
	FC	Species richness	DBF	5.8	2.04396	0.646357
			CBMF	6.9	1.1005	0.34801
			CF	6.6	2.1187	0.669992
		Shannon diversity	DBF	1.645	0.35629	0.112669
			CBMF	1.8328	0.183679	0.0580844
			CF	1.7984	0.315973	0.0999195
Month	MC-bark	Species richness	May	8	4.42719	1.80739
			June	9	2.36643	0.966092
			July	7.16667	2.92689	1.1949
			August	10	5.09902	2.08167
			September	6.8	2.16795	0.969536
			October	7.6	2.07364	0.927362
		Shannon diversity	May	1.5795	0.625171	0.255225
			June	1.89233	0.303199	0.123781
			July	1.61767	0.416733	0.17013
			August	1.89867	0.54768	0.22359
			September	1.6196	0.273149	0.122156
			October	1.8382	0.286611	0.128176
	MC-litter	Species richness	May	6	2.09762	0.856349
			June	6.5	1.37841	0.562731
			July	6.5	2.42899	0.991632
			August	6	1.26491	0.516398
			September	3.16667	1.94079	0.792324
			October	7.6	3.20936	1.43527
		Shannon diversity	May	1.68317	0.303044	0.123717
			June	1.56233	0.270042	0.110244
			July	1.6225	0.540047	0.220473
			August	1.64367	0.293898	0.119984
			September	0.94817	0.650671	0.265635
			October	1.7676	0.551536	0.246655
	FC	Species richness	June	3.33333	0.57735	0.333333
			July	12.1667	2.85774	1.16667
			August	5.5	1.76068	0.718795
		Shannon diversity	June	1.08433	0.232393	0.134172
			July	2.3285	0.24234	0.0989349
			August	1.5885	0.314869	0.128545
