# Supplementary material for: Distribution and diversity of myxomycetes in Tiantangzhai National Forest Park, China
Source: PeerJ. 2021 Aug 25;9:e12059. doi: 10.7717/peerj.12059 (PMC8401731; doi:10.7717/peerj.12059)
Supplement: Supplemental Information 4 [file peerj-09-12059-s004.xlsx]

## Sheet: Sheet1
Supplemental data 4 Records of myxomycete species collected in the field in different months (May: May; Jun: June; Jul: July; Aug: August; Sep: September; Oct: October; Sampling sites: QF, JP, YF, PP, WF, OB ).
FC-Month-Species	May-QF	May-JP	May-YF	May-PP	May-WF	May-OB	Jun-QF	Jun-JP	Jun-YF	Jun-PP	Jun-WF	Jun-OB	Jul-QF	Jul-JP	Jul-YF	Jul-PP	Jul-WF	Jul-OB	Aug-QF	Aug-JP	Aug-YF	Aug-PP	Aug-WF	Aug-OB	Sep-QF	Sep-JP	Sep-YF	Sep-PP	Sep-WF	Sep-OB	Oct-QF	Oct-JP	Oct-YF	Oct-PP	Oct-WF	Oct-OB
Amaurochaete atra	0	0	0	0	0	0	0	0	0	0	0	0	0	0	0	0	0	0	0	0	0	0	0	0	0	0	0	1	0	0	0	0	0	0	0	0
Arcyria cinerea	0	0	0	0	0	0	0	0	0	0	0	0	5	1	1	3	1	2	4	1	1	1	0	0	0	0	0	0	0	0	0	0	0	0	0	0
Arcyria denudata	0	0	0	0	0	0	0	0	0	0	0	0	2	1	0	0	0	0	1	1	1	0	0	0	0	0	0	0	0	0	0	0	0	0	0	0
Arcyria major	0	0	0	0	0	0	0	0	0	0	0	0	0	0	0	0	0	0	0	1	0	0	0	0	0	0	0	0	0	0	0	0	0	0	0	0
Arcyria obvelata	0	0	0	0	0	0	0	0	0	0	0	0	0	3	1	0	0	3	0	0	0	0	0	0	0	0	0	0	0	0	0	0	0	0	0	0
Ceratiomyxa fruticulosa	0	0	0	0	0	0	0	0	1	1	1	1	0	2	1	2	2	3	0	0	1	1	0	1	0	0	0	0	0	0	0	0	0	0	0	0
Collaria arcyrionema	0	0	0	0	0	0	0	0	0	0	0	0	0	2	1	0	1	0	0	0	0	0	0	0	0	0	0	0	0	0	0	0	0	0	0	0
Comatricha nigra	0	0	0	0	0	0	0	0	0	0	0	0	0	0	0	0	0	0	0	1	0	0	0	1	0	0	0	0	0	0	0	0	0	0	0	0
Cribraria aurantiaca	0	0	0	0	0	0	0	0	0	4	0	0	0	1	1	2	0	1	0	2	0	0	3	0	0	0	0	0	0	0	0	0	0	0	0	0
Cribraria microcarpa	0	0	0	0	0	0	0	0	0	0	0	0	0	0	0	0	4	1	0	0	0	0	0	0	0	0	0	0	0	0	0	0	0	0	0	0
Cribraria violacea	0	0	0	0	0	0	0	0	0	0	0	0	0	0	1	0	0	0	0	0	0	0	0	0	0	0	0	0	0	0	0	0	0	0	0	0
Dictydium cancellatum	0	0	0	0	0	0	0	0	0	0	0	0	0	2	0	5	0	3	0	0	0	2	0	0	0	0	0	0	0	0	0	0	0	0	0	0
Diderma effusum	0	0	0	0	0	0	0	0	0	0	0	0	0	0	1	0	1	0	0	0	2	0	1	0	0	0	0	0	0	0	0	0	0	0	0	0
Diderma hemisphaericum	0	0	0	0	0	0	0	0	0	0	0	0	0	0	0	0	0	0	0	0	0	0	1	0	0	0	0	0	0	0	0	0	0	0	0	0
Didymium iridis	0	0	0	0	0	0	0	0	0	0	0	0	0	0	0	0	0	0	0	0	2	0	0	0	0	0	0	0	0	0	0	0	0	0	0	0
Didymium minus	0	0	0	0	0	0	0	0	2	0	0	2	0	0	0	0	1	0	0	0	0	0	0	0	0	0	0	0	0	0	0	0	0	0	0	0
Hemitrichia calyculata	0	0	0	0	0	0	0	0	0	0	0	1	1	0	3	5	1	0	2	0	2	0	0	0	0	0	0	0	0	0	0	0	0	0	0	0
Hemitrichia serpula	0	0	0	0	1	0	0	0	0	0	0	0	0	0	2	0	0	0	3	0	0	0	0	0	0	0	0	0	0	0	0	0	0	2	0	0
Lycogala exigum	2	6	5	0	1	1	1	0	2	1	0	2	0	1	1	5	1	2	0	0	0	1	0	2	1	1	0	0	0	0	0	0	0	0	0	0
Perichaena depressa	0	0	0	0	0	0	0	0	0	0	0	0	0	0	2	0	0	0	0	0	0	0	0	0	0	0	0	0	0	0	0	0	0	0	0	0
Physarum album	0	0	0	0	0	0	0	0	0	0	0	0	2	0	0	2	0	1	0	2	0	0	0	0	0	0	0	0	0	0	0	0	0	0	0	0
Physarum flavicomum	0	0	0	0	0	0	0	0	0	0	0	0	2	0	3	0	0	0	0	0	0	0	0	0	0	0	0	0	0	0	0	0	0	0	0	0
Physarum globuliferum	0	0	0	0	0	0	0	0	0	0	0	0	0	0	0	0	0	2	0	0	0	0	0	0	0	0	0	0	0	0	0	0	0	0	0	0
Physarum melleum	0	0	0	0	0	0	0	0	0	0	0	0	0	0	1	0	0	0	0	1	0	0	0	0	0	0	0	0	0	0	0	0	0	0	0	0
Physarum penetrale	0	0	0	0	0	0	0	0	0	0	0	0	0	0	0	0	8	0	0	0	0	0	0	0	0	0	0	0	0	0	0	0	0	0	0	0
Physarum roseum	0	0	0	0	0	0	0	0	0	0	0	0	0	0	0	0	0	0	0	2	0	0	0	0	0	0	0	0	0	0	0	0	0	0	0	0
Physarum viride	0	0	0	0	0	0	0	0	0	0	0	0	1	1	2	4	3	1	0	0	0	0	0	0	0	0	0	0	0	0	0	0	0	0	0	0
Reticularia lycoperdon	0	0	0	0	0	0	0	0	0	0	0	0	0	0	0	0	0	2	0	0	0	0	0	0	0	0	0	0	0	0	0	0	0	0	0	0
Stemonitis axifera	0	0	0	0	0	0	0	0	0	0	0	0	4	1	1	0	0	0	0	0	0	0	1	0	0	0	0	0	0	0	0	0	0	0	0	0
Stemonitis fusca	0	0	0	0	0	0	0	0	0	0	0	0	2	0	0	0	0	0	0	0	0	0	2	0	0	0	0	0	0	0	0	0	0	0	0	0
Stemonitis pallida	0	0	0	0	0	0	0	0	0	0	0	0	0	0	1	0	0	0	0	0	0	0	0	0	0	0	0	0	0	0	0	0	0	0	0	0
Stemonitis smithii	0	0	0	0	0	0	0	0	0	0	0	0	3	4	4	2	2	1	0	0	0	0	0	0	0	0	0	0	0	0	0	0	0	0	0	0
Trichia botrytis	0	0	0	0	0	0	0	0	0	0	0	0	0	1	0	0	0	0	0	0	0	0	0	2	0	0	0	0	0	0	0	0	0	0	0	0
Trichia contorta	0	0	0	0	0	0	0	0	0	0	0	0	0	0	0	0	0	0	0	0	0	0	1	0	0	0	0	0	0	0	0	0	0	0	0	0
Trichia erecta	0	0	0	0	0	0	0	0	0	0	0	0	0	0	0	0	0	1	0	0	0	0	0	0	0	0	0	0	0	0	0	0	0	0	0	0
Trichia lutescens	0	0	0	0	0	0	0	0	0	0	0	0	0	0	0	0	0	0	0	0	0	0	1	0	0	0	0	0	0	0	0	0	0	1	0	0
Tubifera ferruginosa	0	0	0	0	0	0	0	0	0	0	0	0	0	1	0	3	0	0	0	0	0	0	0	0	0	0	0	0	0	0	0	0	0	0	0	0
