# Supplementary material for: Distribution and diversity of myxomycetes in Tiantangzhai National Forest Park, China
Source: PeerJ. 2021 Aug 25;9:e12059. doi: 10.7717/peerj.12059 (PMC8401731; doi:10.7717/peerj.12059)
Supplement: Supplemental Information 5 [file peerj-09-12059-s005.xls]

## Sheet: Sheet1
Supplemental data 5 Records of myxomycete species of MC-bark in different forest types (DBF: deciduous broad-leaved forest; CBMF: coniferous broad-leaved mixed forest; CF: coniferous forest; Sampling sites: QF, JP, YF, PP, WF, OB; Repetitive sampling plots: A-E ).
MC-bark-Forest type-Species	DBF-QF-A	DBF-QF-B	DBF-QF-C	DBF-QF-D	DBF-JP-A	DBF-JP-B	DBF-JP-C	DBF-JP-D	DBF-JP-E	CBMF-YF-A	CBMF-YF-B	CBMF-YF-C	CBMF-YF-D	CBMF-YF-E	CNMF-PP-A	CNMF-PP-B	CNMF-PP-C	CNMF-PP-D	CNMF-PP-E	CF-WF-A	CF-WF-B	CF-WF-C	CF-WF-D	CF-WF-E	CF-OB-A	CF-OB-B	CF-OB-C	CF-OB-D	CF-OB-E
Arcyria cinerea	1	0	0	0	1	0	1	4	3	5	11	1	2	3	2	0	0	3	2	6	5	3	2	3	3	1	4	3	1
Arcyria denudata	0	0	0	0	0	0	0	0	0	0	0	0	0	0	0	0	0	1	0	0	0	0	0	0	0	0	0	0	0
Calomyxa metallica	1	0	0	0	0	0	0	0	2	0	2	0	0	0	0	0	0	0	0	0	0	0	0	0	0	0	0	0	0
Clastoderma debaryanum	0	0	1	0	6	2	5	1	2	9	9	7	8	3	0	5	3	1	6	6	14	10	11	11	13	7	7	4	8
Colloderma oculatum	0	0	0	0	0	0	0	0	0	11	15	12	10	6	15	10	12	10	19	20	12	16	15	10	13	9	11	11	7
Comatricha aequalis	0	0	0	0	0	0	0	0	0	0	1	0	0	0	0	0	0	0	0	0	0	0	0	0	0	0	0	0	0
Comatricha nigra	0	0	0	2	0	0	0	0	0	0	0	0	0	0	0	0	0	0	0	0	0	0	0	0	0	0	0	0	0
Comatricha pulchella	0	0	0	0	0	0	0	0	0	0	1	0	0	0	0	0	0	0	0	0	0	0	0	0	0	0	0	0	0
Cribraria confusa	0	1	5	0	5	3	2	6	0	0	0	0	0	0	0	0	0	0	0	0	0	0	0	0	0	0	0	0	0
Cribraria microcarpa	0	1	0	0	2	0	1	1	0	0	0	0	0	0	2	2	0	1	2	0	0	2	3	0	0	2	0	0	0
Cribraria minutissima	0	0	0	0	0	0	0	0	0	1	1	2	0	0	0	0	0	0	3	0	0	0	0	1	0	0	0	0	0
Diderma effusum	0	0	0	0	0	0	1	0	0	0	4	8	0	5	2	2	2	2	2	2	0	0	0	2	0	0	0	0	0
Didymium clavus	0	1	0	0	0	0	0	0	0	0	0	0	0	0	0	0	0	0	0	0	0	0	0	0	0	0	0	0	0
Didymium melanospermum	0	0	0	0	0	0	0	1	0	0	0	0	0	0	0	0	0	0	0	0	0	0	0	0	0	0	0	0	0
Didymium minus	0	0	0	1	0	0	0	0	0	0	0	0	0	0	0	0	0	0	0	0	0	0	0	0	0	0	0	0	0
Didymium squamulosum	0	0	0	0	0	0	0	0	1	0	0	0	0	0	0	1	0	0	0	0	0	0	0	0	0	0	0	0	0
Echinostelium minutum	0	0	1	0	6	0	1	2	1	4	6	7	2	2	8	3	5	8	0	4	4	1	3	4	4	10	5	5	0
Hemitrichia minor	0	0	0	0	0	0	0	0	0	1	0	0	0	0	0	0	1	0	0	0	0	0	0	0	0	0	0	0	0
Hemitrichia serpula	0	0	0	0	0	0	0	0	0	0	0	0	0	0	0	0	0	0	0	0	0	0	1	0	0	0	0	0	0
Licea biforis	0	0	0	0	0	1	0	0	0	0	1	3	0	0	0	0	0	0	0	0	0	0	0	0	0	0	0	0	0
Licea castanea	0	0	0	0	1	0	4	0	0	0	0	0	0	0	0	1	0	0	0	0	0	0	0	0	0	0	0	0	0
Licea minima	0	0	0	0	1	2	0	2	0	1	0	3	0	0	1	4	2	0	2	0	1	0	1	0	0	1	0	0	0
Licea operculata	0	0	0	2	1	0	0	0	0	3	7	8	5	1	6	1	5	2	4	0	1	4	1	0	4	4	2	3	3
Licea pedicellata	0	0	0	1	0	2	0	1	0	0	0	0	0	0	0	0	0	0	0	0	0	0	0	0	0	0	0	0	0
Licea pusilla	0	0	0	0	0	0	0	1	0	0	0	0	0	0	0	0	1	0	0	0	0	0	1	0	0	0	0	0	0
Licea variabilis	0	0	0	0	0	0	0	0	0	0	0	0	0	0	0	0	0	0	0	0	0	0	0	0	0	0	0	1	0
Macbrideola scintillans	0	0	0	0	0	2	0	3	3	0	0	0	0	0	0	0	0	0	0	0	0	0	0	0	0	0	0	0	0
Paradiacheopsis erythropodia	0	1	0	2	1	0	1	3	0	1	0	2	1	0	0	0	0	0	0	0	0	0	0	1	0	1	0	1	1
Paradiacheopsis fimbriata	0	0	0	0	0	0	0	0	1	0	0	0	0	0	0	0	0	1	0	0	0	0	0	0	0	0	0	0	0
Perichaena corticalis	0	0	1	0	0	0	0	1	2	0	2	1	0	3	4	1	2	0	1	2	0	0	0	0	0	0	0	0	0
Perichaena pedata	0	0	0	0	0	0	0	0	0	0	0	0	0	0	0	1	0	0	0	0	0	0	0	0	0	0	0	0	0
Physarum album	0	0	0	0	4	0	3	1	2	1	1	1	4	2	0	1	1	0	0	2	1	0	1	6	0	0	0	0	0
Physarum oblatum	0	0	0	0	0	0	0	0	0	0	0	0	0	0	0	0	0	0	0	1	0	0	0	0	0	0	0	0	0
Physarum pusillum	0	0	0	0	1	0	0	0	0	0	1	0	0	0	0	0	0	0	0	0	0	0	0	1	0	0	0	0	0
Stemonitis fusca	0	1	0	0	4	1	2	0	1	0	0	0	0	0	0	0	0	0	0	0	0	0	0	0	0	0	0	0	0
Stemonitopsis reticulata	0	0	0	0	0	0	0	0	1	0	1	0	1	0	1	0	0	0	0	0	0	0	0	0	0	0	0	0	0
Trichia botrytis	3	0	0	1	1	0	0	3	2	2	0	0	1	0	0	1	4	1	0	0	0	1	1	0	2	0	0	0	1
Trichia favoginea	0	2	0	0	0	0	0	0	0	0	0	0	0	0	0	0	0	0	0	0	0	0	0	0	0	0	0	0	0
