# Supplementary material for: Distribution and diversity of myxomycetes in Tiantangzhai National Forest Park, China
Source: PeerJ. 2021 Aug 25;9:e12059. doi: 10.7717/peerj.12059 (PMC8401731; doi:10.7717/peerj.12059)
Supplement: Supplemental Information 6 [file peerj-09-12059-s006.xlsx]

## Sheet: Sheet1
Supplemental data 6 Records of myxomycete species of MC-litter in different months (May: May; Jun: June; Jul: July; Aug: August; Sep: September; Oct: October; Sampling sites: QF, JP, YF, PP, WF, OB ).
MC-Litter-Month-Species	May-QF	May-JP	May-YF	May-PP	May-WF	May-OB	Jun-QF	Jun-JP	Jun-YF	Jun-PP	Jun-WF	Jun-OB	Jul-QF	Jul-JP	Jul-YF	Jul-PP	Jul-WF	Jul-OB	Aug-QF	Aug-JP	Aug-YF	Aug-PP	Aug-WF	Aug-OB	Sep-QF	Sep-JP	Sep-YF	Sep-PP	Sep-WF	Sep-OB	Oct-JP	Oct-YF	Oct-PP	Oct-WF	Oct-OB
Arcyria cinerea	3	4	1	3	1	1	1	5	9	7	9	9	0	3	3	3	8	3	2	4	5	0	6	2	3	1	1	1	0	0	1	1	8	6	1
Arcyria denudata	2	1	0	1	1	1	1	1	2	1	4	4	0	0	0	0	1	1	0	3	0	0	0	1	0	1	2	0	1	1	1	0	3	0	1
Calomyxa metallica	0	1	0	1	0	0	0	0	0	0	0	0	0	0	0	0	0	0	0	0	2	0	0	0	0	0	0	0	0	0	0	0	0	0	0
Ceratiomyxa fruticulosa	0	0	1	0	0	0	0	0	0	0	0	0	0	0	0	0	0	0	0	0	0	0	0	0	0	0	0	1	0	0	1	1	0	0	2
Clastoderma debaryanum	0	2	1	0	0	1	2	0	3	1	0	3	0	1	1	1	0	3	0	1	6	1	0	1	0	0	0	0	0	0	0	1	1	3	1
Collaria arcyrionema	0	0	0	0	0	0	0	0	0	0	0	0	0	0	0	0	0	0	1	0	0	0	0	0	0	0	0	0	0	0	0	0	0	0	1
Comatricha nigra	0	0	0	0	1	0	0	0	0	0	0	0	0	0	0	0	0	0	1	0	1	0	0	0	0	0	0	0	0	0	0	0	0	0	0
Comatricha pulchella	0	0	0	0	0	0	0	0	1	0	1	0	0	0	1	1	0	0	0	0	0	1	1	0	0	0	0	0	0	1	0	0	0	0	0
Cribraria microcarpa	0	0	0	0	0	0	0	0	0	0	0	0	1	0	1	0	0	0	0	0	2	1	0	0	0	0	1	0	0	0	1	1	0	0	0
Cribraria violacea	0	1	0	0	0	0	0	0	1	0	0	0	0	0	0	1	0	0	0	0	0	0	0	0	0	0	0	0	0	0	0	0	0	0	0
Diachea splendens	0	0	0	0	0	0	0	0	0	0	0	0	0	0	0	0	0	0	0	0	0	0	0	0	0	0	0	0	0	0	1	0	0	0	0
Diachea subsessilis	0	0	0	0	0	0	0	0	0	0	0	0	0	0	0	0	0	0	0	0	0	1	0	0	0	0	0	0	0	0	1	0	0	0	0
Diderma effusum	0	0	1	0	0	0	0	0	2	2	1	2	0	1	1	1	0	1	0	0	2	0	0	0	0	1	0	0	0	0	1	1	4	0	0
Diderma hemisphaericum	0	0	0	0	0	0	0	0	0	0	0	0	0	0	0	0	0	0	0	0	0	0	0	0	0	0	0	0	0	0	1	0	0	0	0
Echinostelium minutum	0	0	0	0	0	0	1	0	0	0	0	1	0	1	0	0	3	1	0	0	0	1	2	0	0	0	0	0	0	0	0	1	1	0	0
Hemitrichia minor	0	0	0	0	0	0	0	0	0	0	0	0	0	0	0	0	0	0	0	0	0	0	0	0	1	0	0	0	0	0	0	0	0	0	0
Hemitrichia serpula	0	0	1	0	0	1	0	0	0	0	1	0	0	0	0	0	0	0	0	0	0	0	0	0	0	0	0	0	0	0	0	0	0	0	0
Licea castanea	0	2	0	0	0	0	0	0	0	0	0	0	0	0	0	0	0	0	0	0	0	0	0	0	0	0	0	0	0	0	0	0	0	0	0
Licea kleistobolus	0	0	0	0	0	0	0	0	0	1	0	0	0	0	0	0	0	0	0	0	0	0	0	0	0	0	0	0	0	0	0	0	0	0	0
Licea minima	0	0	0	0	1	0	0	0	0	0	0	0	0	0	0	0	1	0	0	0	0	0	0	0	0	0	0	0	0	0	1	0	0	0	0
Licea operculata	0	1	0	0	0	0	0	0	0	0	0	0	0	0	0	0	0	0	1	0	0	0	0	0	0	0	0	0	0	0	0	0	0	0	0
Licea variabilis	0	0	0	0	0	0	0	0	0	0	0	0	0	0	0	0	0	0	0	0	0	0	0	0	0	0	0	0	0	0	0	0	0	0	1
Paradiacheopsis erythropodia	0	0	0	0	0	0	0	0	0	0	0	0	0	0	0	0	0	0	0	0	0	0	0	1	0	0	0	0	0	0	0	0	0	0	0
Perichaena corticalis	0	0	0	0	0	0	0	1	2	0	0	0	0	3	2	2	0	0	1	0	0	0	0	0	0	1	0	0	0	0	0	1	0	0	0
Perichaena depressa	0	0	0	0	0	0	0	0	0	0	0	0	0	0	0	0	0	0	0	0	0	0	0	0	0	1	0	0	0	0	0	0	0	0	0
Physarum album	0	0	0	0	0	0	0	0	0	0	1	0	0	0	0	0	0	0	0	0	0	0	0	0	0	0	0	0	0	0	0	0	0	0	1
Physarum bivalve	0	1	0	0	0	0	0	0	0	0	0	0	0	0	0	0	0	0	0	0	0	0	0	0	0	0	0	0	0	0	0	0	0	0	0
Physarum cinereum	0	0	0	0	0	0	0	0	0	0	0	0	0	0	1	0	0	0	0	0	0	0	0	0	0	0	0	0	0	0	0	0	0	0	0
Physarum lateritium	0	0	0	0	0	0	0	0	0	0	0	0	0	0	0	0	0	0	0	0	0	0	0	0	0	0	0	0	0	0	1	0	0	0	0
Physarum melleum	0	0	0	0	0	0	0	0	0	0	0	0	0	0	1	0	0	0	0	1	0	0	0	0	0	0	0	0	0	0	0	0	0	0	0
Physarum nucleatum	0	0	0	0	0	0	0	0	0	0	0	0	0	1	0	0	0	0	0	0	0	0	0	0	0	0	0	0	0	0	0	0	0	0	0
Physarum pusillum	0	0	0	0	0	0	1	0	0	0	0	0	0	0	0	0	1	0	0	1	0	0	0	0	0	1	0	0	0	0	0	0	0	0	0
Stemonitis fusca	1	0	1	1	1	1	0	0	2	1	0	1	0	2	0	1	0	1	1	2	0	0	0	1	1	0	1	0	0	0	4	3	1	1	2
Stemonitopsis reticulata	1	1	0	1	0	0	2	3	0	1	0	1	2	2	1	0	1	2	1	0	1	1	1	0	0	0	1	0	0	0	1	0	1	0	0
Trichia botrytis	0	0	0	0	0	0	1	0	0	0	0	0	0	0	0	0	0	0	0	0	0	0	0	0	0	0	0	0	0	0	0	0	0	0	0
Trichia decipiens	0	0	0	0	1	0	0	0	0	0	0	0	0	0	0	0	0	0	0	0	0	0	0	0	0	0	0	0	0	0	0	0	0	0	0
Trichia favoginea	0	1	0	0	0	0	0	0	0	0	0	0	0	0	0	0	0	0	0	1	0	0	0	0	0	0	0	0	0	0	0	0	0	0	0
