# Supplementary material for: Distribution and diversity of myxomycetes in Tiantangzhai National Forest Park, China
Source: PeerJ. 2021 Aug 25;9:e12059. doi: 10.7717/peerj.12059 (PMC8401731; doi:10.7717/peerj.12059)
Supplement: Supplemental Information 7 [file peerj-09-12059-s007.xlsx]

## Sheet: Sheet1
Supplemental data 7 Results of ANOSIM in different assemblages based on Bray-Curtis distance
Assemblages	Group	R	P
Sampling month of FC assemblages	June/July	0.913	0.003
	June/Aug	0.133	0.134
	July/Aug	0.321	0.011
	Total	0.437	0.001
Forest types of MC-bark assemblages	DBF/CBMF	0.633333	0.001
	DBF/CF	0.636351	0.001
	CBMF/CF	0.200111	0.007
	Total	0.445	0.001
Sampling month of MC-litter assemblages	May/June	0.391667	0.005
	May/July	0.232407	0.025
	May/Aug	0.0240741	0.341
	May/Sep	0.041	0.33
	May/Oct	0.136	0.162
	June/July	0.0925926	0.156
	June/Aug	0.0333333	0.334
	June/Sep	0.383	0.007
	June/Oct	0.218667	0.066
	July/Aug	-0.162037	0.959
	July/Sep	0.25	0.026
	July/Oct	0.0906667	0.23
	Aug/Sep	0.197	0.065
	Aug/Oct	-0.0306667	0.52
	Sep/Oct	0.227	0.082
	Total	0.133	0.009
