# Supplementary material for: Distribution and diversity of myxomycetes in Tiantangzhai National Forest Park, China
Source: PeerJ. 2021 Aug 25;9:e12059. doi: 10.7717/peerj.12059 (PMC8401731; doi:10.7717/peerj.12059)
Supplement: Supplemental Information 8 [file peerj-09-12059-s008.xlsx]

## Sheet: Sheet1
Supplemental data 8 Biomarkers with significant differences in LEFSe of myxomycete species collected in the field in diffenent sampling months.
Biomarker	Logarithm value	Group	LDA Score	P value
Protist	6			-
Protist.Mycetozoa	6			-
Protist.Mycetozoa.Myxomycetes	6			-
Protist.Mycetozoa.Myxomycetes.Ceratiomyxales	5.48667			-
Protist.Mycetozoa.Myxomycetes.Ceratiomyxales.Ceratiomyxaceae	5.48667			-
Protist.Mycetozoa.Myxomycetes.Ceratiomyxales.Ceratiomyxaceae.Ceratiomyxa	5.48667			-
Protist.Mycetozoa.Myxomycetes.Ceratiomyxales.Ceratiomyxaceae.Ceratiomyxa.Ceratiomyxafruticulosa	5.48667			-
Protist.Mycetozoa.Myxomycetes.Liceales	5.7104			-
Protist.Mycetozoa.Myxomycetes.Liceales.Cribrariaceae	5.16723			-
Protist.Mycetozoa.Myxomycetes.Liceales.Cribrariaceae.Cribraria	5.12494			-
Protist.Mycetozoa.Myxomycetes.Liceales.Cribrariaceae.Cribraria.Cribrariaaurantiaca	5.12494			-
Protist.Mycetozoa.Myxomycetes.Liceales.Cribrariaceae.Cribraria.Cribrariamicrocarpa	4.53037			-
Protist.Mycetozoa.Myxomycetes.Liceales.Cribrariaceae.Cribraria.Cribrariaviolacea	3.79048			-
Protist.Mycetozoa.Myxomycetes.Liceales.Cribrariaceae.Dictydium	4.82391			-
Protist.Mycetozoa.Myxomycetes.Liceales.Cribrariaceae.Dictydium.Dictydiumcancellatum	4.82391			-
Protist.Mycetozoa.Myxomycetes.Liceales.Enteridiaceae	5.57978			-
Protist.Mycetozoa.Myxomycetes.Liceales.Enteridiaceae.Enteridium	4.16115			-
Protist.Mycetozoa.Myxomycetes.Liceales.Enteridiaceae.Enteridium.Enteridiumlycoperdon	4.16115			-
Protist.Mycetozoa.Myxomycetes.Liceales.Enteridiaceae.Lycogala	5.57978			-
Protist.Mycetozoa.Myxomycetes.Liceales.Enteridiaceae.Lycogala.Lycogalaexigum	5.57978			-
Protist.Mycetozoa.Myxomycetes.Liceales.Enteridiaceae.Tubifera	4.36339			-
Protist.Mycetozoa.Myxomycetes.Liceales.Enteridiaceae.Tubifera.Tubiferaferruginosa	4.36339			-
Protist.Mycetozoa.Myxomycetes.Physarales	5.37103			-
Protist.Mycetozoa.Myxomycetes.Physarales.Didymiaceae	5.16633			-
Protist.Mycetozoa.Myxomycetes.Physarales.Didymiaceae.Diderma	4.84739			-
Protist.Mycetozoa.Myxomycetes.Physarales.Didymiaceae.Diderma.Didermaeffusum	4.73			-
Protist.Mycetozoa.Myxomycetes.Physarales.Didymiaceae.Diderma.Didermahemisphaericum	4.22185			-
Protist.Mycetozoa.Myxomycetes.Physarales.Didymiaceae.Didymium	5.16633			-
Protist.Mycetozoa.Myxomycetes.Physarales.Didymiaceae.Didymium.Didymiumiridis	4.56864			-
Protist.Mycetozoa.Myxomycetes.Physarales.Didymiaceae.Didymium.Didymiumminus	5.16633			-
Protist.Mycetozoa.Myxomycetes.Physarales.Physaraceae	5.3334	July	5.085	0.00774089
Protist.Mycetozoa.Myxomycetes.Physarales.Physaraceae.Physarum	5.3334	July	5.08354	0.00774089
Protist.Mycetozoa.Myxomycetes.Physarales.Physaraceae.Physarum.Physarumalbum	4.51187			-
Protist.Mycetozoa.Myxomycetes.Physarales.Physaraceae.Physarum.Physarumflavicomum	4.52724			-
Protist.Mycetozoa.Myxomycetes.Physarales.Physaraceae.Physarum.Physarumglobuliferum	4.16115			-
Protist.Mycetozoa.Myxomycetes.Physarales.Physaraceae.Physarum.Physarummelleum	4.18046			-
Protist.Mycetozoa.Myxomycetes.Physarales.Physaraceae.Physarum.Physarumpenetrale	4.727			-
Protist.Mycetozoa.Myxomycetes.Physarales.Physaraceae.Physarum.Physarumroseum	4.48149			-
Protist.Mycetozoa.Myxomycetes.Physarales.Physaraceae.Physarum.Physarumviride	4.87683			-
Protist.Mycetozoa.Myxomycetes.Stemonitales	5.31026	July	5.07662	0.0133042
Protist.Mycetozoa.Myxomycetes.Stemonitales.Stemonitaceae	5.31026	July	5.07832	0.0133042
Protist.Mycetozoa.Myxomycetes.Stemonitales.Stemonitaceae.Amaurochaete	0			-
Protist.Mycetozoa.Myxomycetes.Stemonitales.Stemonitaceae.Amaurochaete.Amaurochaeteatra	0			-
Protist.Mycetozoa.Myxomycetes.Stemonitales.Stemonitaceae.Collaria	4.45807			-
Protist.Mycetozoa.Myxomycetes.Stemonitales.Stemonitaceae.Collaria.Collariaarcyrionema	4.45807			-
Protist.Mycetozoa.Myxomycetes.Stemonitales.Stemonitaceae.Comatricha	4.63275			-
Protist.Mycetozoa.Myxomycetes.Stemonitales.Stemonitaceae.Comatricha.Comatrichanigra	4.63275			-
Protist.Mycetozoa.Myxomycetes.Stemonitales.Stemonitaceae.Stemonitis	5.24448	July	4.9899	0.00569334
Protist.Mycetozoa.Myxomycetes.Stemonitales.Stemonitaceae.Stemonitis.Stemonitisaxifera	4.6475			-
Protist.Mycetozoa.Myxomycetes.Stemonitales.Stemonitaceae.Stemonitis.Stemonitisfusca	4.52288			-
Protist.Mycetozoa.Myxomycetes.Stemonitales.Stemonitaceae.Stemonitis.Stemonitispallida	3.79048			-
Protist.Mycetozoa.Myxomycetes.Stemonitales.Stemonitaceae.Stemonitis.Stemonitissmithii	5.04078			-
Protist.Mycetozoa.Myxomycetes.Trichiales	5.6111	Aug	5.3414	0.00784332
Protist.Mycetozoa.Myxomycetes.Trichiales.Trichiaceae	5.6111	Aug	5.33972	0.00784332
Protist.Mycetozoa.Myxomycetes.Trichiales.Trichiaceae.Arcyria	5.2992	Aug	5.05634	0.0230076
Protist.Mycetozoa.Myxomycetes.Trichiales.Trichiaceae.Arcyria.Arcyriacinerea	5.12603	Aug	4.91204	0.0239214
Protist.Mycetozoa.Myxomycetes.Trichiales.Trichiaceae.Arcyria.Arcyriadenudata	4.70188			-
Protist.Mycetozoa.Myxomycetes.Trichiales.Trichiaceae.Arcyria.Arcyriamajor	4.18046			-
Protist.Mycetozoa.Myxomycetes.Trichiales.Trichiaceae.Arcyria.Arcyriaobvelata	4.71367			-
Protist.Mycetozoa.Myxomycetes.Trichiales.Trichiaceae.Hemitrichia	5.08052			-
Protist.Mycetozoa.Myxomycetes.Trichiales.Trichiaceae.Hemitrichia.Hemitrichiacalyculata	4.84739			-
Protist.Mycetozoa.Myxomycetes.Trichiales.Trichiaceae.Hemitrichia.Hemitrichiaserpula	4.69897			-
Protist.Mycetozoa.Myxomycetes.Trichiales.Trichiaceae.Perichaena	4.09151			-
Protist.Mycetozoa.Myxomycetes.Trichiales.Trichiaceae.Perichaena.Perichaenadepressa	4.09151			-
Protist.Mycetozoa.Myxomycetes.Trichiales.Trichiaceae.Trichia	4.94885			-
Protist.Mycetozoa.Myxomycetes.Trichiales.Trichiaceae.Trichia.Trichiabotrytis	4.74473			-
Protist.Mycetozoa.Myxomycetes.Trichiales.Trichiaceae.Trichia.Trichiacalyculata	4.22185			-
Protist.Mycetozoa.Myxomycetes.Trichiales.Trichiaceae.Trichia.Trichiaerecta	3.86012			-
Protist.Mycetozoa.Myxomycetes.Trichiales.Trichiaceae.Trichia.Trichialutescens	4.22185			-
