# Supplementary material for: Distribution and diversity of myxomycetes in Tiantangzhai National Forest Park, China
Source: PeerJ. 2021 Aug 25;9:e12059. doi: 10.7717/peerj.12059 (PMC8401731; doi:10.7717/peerj.12059)
Supplement: Supplemental Information 9 [file peerj-09-12059-s009.xlsx]

## Sheet: Sheet1
Supplemental data 9 Biomarkers with significant differences in LEFSe of myxomycete species of MC-bark in different forest types.
Biomarker	Logarithm value	Group	LDA Score	P value
Protist	6			-
Protist.Mycetozoa	6			-
Protist.Mycetozoa.Myxomycetes	6			-
Protist.Mycetozoa.Myxomycetes.Echinosteliales	5.57703	CF	5.08804	0.000578182
Protist.Mycetozoa.Myxomycetes.Echinosteliales.Clastodermataceae	5.42058	CF	4.94585	0.00175079
Protist.Mycetozoa.Myxomycetes.Echinosteliales.Clastodermataceae.Clastoderma	5.42058	CF	4.94585	0.00175079
Protist.Mycetozoa.Myxomycetes.Echinosteliales.Clastodermataceae.Clastoderma.Clastodermadebaryanum	5.42058	CF	4.94585	0.00175079
Protist.Mycetozoa.Myxomycetes.Echinosteliales.Echinosteliaceae	5.06001			-
Protist.Mycetozoa.Myxomycetes.Echinosteliales.Echinosteliaceae.Echinostelium	5.06001			-
Protist.Mycetozoa.Myxomycetes.Echinosteliales.Echinosteliaceae.Echinostelium.Echinosteliumminutum	5.06001			-
Protist.Mycetozoa.Myxomycetes.Liceales	5.50114	DBF	5.04813	0.0260449
Protist.Mycetozoa.Myxomycetes.Liceales.Cribrariaceae	5.28218			-
Protist.Mycetozoa.Myxomycetes.Liceales.Cribrariaceae.Cribraria	5.28218			-
Protist.Mycetozoa.Myxomycetes.Liceales.Cribrariaceae.Cribraria.Cribrariaconfusa	5.2044			-
Protist.Mycetozoa.Myxomycetes.Liceales.Cribrariaceae.Cribraria.Cribrariamicrocarpa	4.49698			-
Protist.Mycetozoa.Myxomycetes.Liceales.Cribrariaceae.Cribraria.Cribrariaminutissima	4.17912			-
Protist.Mycetozoa.Myxomycetes.Liceales.Liceaceae	5.16054			-
Protist.Mycetozoa.Myxomycetes.Liceales.Liceaceae.Licea	5.16054			-
Protist.Mycetozoa.Myxomycetes.Liceales.Liceaceae.Licea.Liceabiforis	3.93181			-
Protist.Mycetozoa.Myxomycetes.Liceales.Liceaceae.Licea.Liceacastanea	4.38796			-
Protist.Mycetozoa.Myxomycetes.Liceales.Liceaceae.Licea.Liceakleistobolus	0			-
Protist.Mycetozoa.Myxomycetes.Liceales.Liceaceae.Licea.Liceaminima	4.51481			-
Protist.Mycetozoa.Myxomycetes.Liceales.Liceaceae.Licea.Liceaoperculata	4.99695			-
Protist.Mycetozoa.Myxomycetes.Liceales.Liceaceae.Licea.Liceapedicellata	4.5204			-
Protist.Mycetozoa.Myxomycetes.Liceales.Liceaceae.Licea.Liceapusilla	3.56864			-
Protist.Mycetozoa.Myxomycetes.Liceales.Liceaceae.Licea.Liceavariabilis	3.55284			-
Protist.Mycetozoa.Myxomycetes.Physarales	5.01976			-
Protist.Mycetozoa.Myxomycetes.Physarales.Didymiaceae	4.85535	CBMF	4.50029	0.010703
Protist.Mycetozoa.Myxomycetes.Physarales.Didymiaceae.Diderma	4.83658	CBMF	4.52501	0.000887427
Protist.Mycetozoa.Myxomycetes.Physarales.Didymiaceae.Diderma.Didermaeffusum	4.83658	CBMF	4.52698	0.000887427
Protist.Mycetozoa.Myxomycetes.Physarales.Didymiaceae.Diderma.Didermahemisphaericum	0			-
Protist.Mycetozoa.Myxomycetes.Physarales.Didymiaceae.Didymium	4.5707			-
Protist.Mycetozoa.Myxomycetes.Physarales.Didymiaceae.Didymium.Didymiumclavus	4.20066			-
Protist.Mycetozoa.Myxomycetes.Physarales.Didymiaceae.Didymium.Didymiummelanospermum	3.56864			-
Protist.Mycetozoa.Myxomycetes.Physarales.Didymiaceae.Didymium.Didymiumminus	4.09151			-
Protist.Mycetozoa.Myxomycetes.Physarales.Didymiaceae.Didymium.Didymiumsquamulosum	3.72354			-
Protist.Mycetozoa.Myxomycetes.Physarales.Physaraceae	4.66744			-
Protist.Mycetozoa.Myxomycetes.Physarales.Physaraceae.Physarum	4.66744			-
Protist.Mycetozoa.Myxomycetes.Physarales.Physaraceae.Physarum.Physarumalbum	4.63579			-
Protist.Mycetozoa.Myxomycetes.Physarales.Physaraceae.Physarum.Physarumoblatum	3.36653			-
Protist.Mycetozoa.Myxomycetes.Physarales.Physaraceae.Physarum.Physarumpusillum	3.51428			-
Protist.Mycetozoa.Myxomycetes.Stemonitales	5.56564			-
Protist.Mycetozoa.Myxomycetes.Stemonitales.Stemonitaceae	5.56564			-
Protist.Mycetozoa.Myxomycetes.Stemonitales.Stemonitaceae.Colloderma	5.54909	CF	5.26744	4.22538e-05
Protist.Mycetozoa.Myxomycetes.Stemonitales.Stemonitaceae.Colloderma.Collodermaoculatum	5.54909	CF	5.26744	4.22538e-05
Protist.Mycetozoa.Myxomycetes.Stemonitales.Stemonitaceae.Comatricha	4.39254			-
Protist.Mycetozoa.Myxomycetes.Stemonitales.Stemonitaceae.Comatricha.Comatrichaaequalis	3.20066			-
Protist.Mycetozoa.Myxomycetes.Stemonitales.Stemonitaceae.Comatricha.Comatrichanigra	4.39254			-
Protist.Mycetozoa.Myxomycetes.Stemonitales.Stemonitaceae.Comatricha.Comatrichapulchella	3.20066			-
Protist.Mycetozoa.Myxomycetes.Stemonitales.Stemonitaceae.Macbrideola	4.64422			-
Protist.Mycetozoa.Myxomycetes.Stemonitales.Stemonitaceae.Macbrideola.Macbrideolascintillans	4.64422			-
Protist.Mycetozoa.Myxomycetes.Stemonitales.Stemonitaceae.Paradiacheopsis	4.81641			-
Protist.Mycetozoa.Myxomycetes.Stemonitales.Stemonitaceae.Paradiacheopsis.Paradiacheopsiserythropodia	4.77985			-
Protist.Mycetozoa.Myxomycetes.Stemonitales.Stemonitaceae.Paradiacheopsis.Paradiacheopsisfimbriata	3.72354			-
Protist.Mycetozoa.Myxomycetes.Stemonitales.Stemonitaceae.Stemonitis	4.72726			-
Protist.Mycetozoa.Myxomycetes.Stemonitales.Stemonitaceae.Stemonitis.Stemonitisfusca	4.72726			-
Protist.Mycetozoa.Myxomycetes.Stemonitales.Stemonitaceae.Stemonitopsis	3.84308			-
Protist.Mycetozoa.Myxomycetes.Stemonitales.Stemonitaceae.Stemonitopsis.Stemonitopsisreticulata	3.84308			-
Protist.Mycetozoa.Myxomycetes.Trichiales	5.4119			-
Protist.Mycetozoa.Myxomycetes.Trichiales.Dianemaceae	4.51593			-
Protist.Mycetozoa.Myxomycetes.Trichiales.Dianemaceae.Calomyxa	4.51593			-
Protist.Mycetozoa.Myxomycetes.Trichiales.Dianemaceae.Calomyxa.Calomyxametallica	4.51593			-
Protist.Mycetozoa.Myxomycetes.Trichiales.Trichiaceae	5.35288			-
Protist.Mycetozoa.Myxomycetes.Trichiales.Trichiaceae.Arcyria	4.94315			-
Protist.Mycetozoa.Myxomycetes.Trichiales.Trichiaceae.Arcyria.Arcyriacinerea	4.94315			-
Protist.Mycetozoa.Myxomycetes.Trichiales.Trichiaceae.Arcyria.Arcyriadenudata	3.52288			-
Protist.Mycetozoa.Myxomycetes.Trichiales.Trichiaceae.Hemitrichia	3.71564			-
Protist.Mycetozoa.Myxomycetes.Trichiales.Trichiaceae.Hemitrichia.Hemitrichiaminor	3.71564			-
Protist.Mycetozoa.Myxomycetes.Trichiales.Trichiaceae.Hemitrichia.Hemitrichiaserpula	3.39794			-
Protist.Mycetozoa.Myxomycetes.Trichiales.Trichiaceae.Perichaena	4.60758	CBMF	4.24038	0.0408717
Protist.Mycetozoa.Myxomycetes.Trichiales.Trichiaceae.Perichaena.Perichaenacorticalis	4.57382			-
Protist.Mycetozoa.Myxomycetes.Trichiales.Trichiaceae.Perichaena.Perichaenapedata	3.48149			-
Protist.Mycetozoa.Myxomycetes.Trichiales.Trichiaceae.Trichia	5.13264			-
Protist.Mycetozoa.Myxomycetes.Trichiales.Trichiaceae.Trichia.Trichiabotrytis	5.01692			-
Protist.Mycetozoa.Myxomycetes.Trichiales.Trichiaceae.Trichia.Trichiafavoginea	4.50169			-
