# Supplementary material for: Distribution and diversity of myxomycetes in Tiantangzhai National Forest Park, China
Source: PeerJ. 2021 Aug 25;9:e12059. doi: 10.7717/peerj.12059 (PMC8401731; doi:10.7717/peerj.12059)
Supplement: Supplemental Information 10 [file peerj-09-12059-s010.xlsx]

## Sheet: Sheet1
Supplemental data 10 Biomarkers with significant differences in LEFSe of myxomycete species of MC-litter in different sampling months.
Biomarker	Logarithm value	Group	LDA Score	P value
Protist	6			-
Protist.Mycetozoa	6			-
Protist.Mycetozoa.Myxomycetes	6			-
Protist.Mycetozoa.Myxomycetes.Ceratiomyxales	4.92082			-
Protist.Mycetozoa.Myxomycetes.Ceratiomyxales.Ceratiomyxaceae	4.92082			-
Protist.Mycetozoa.Myxomycetes.Ceratiomyxales.Ceratiomyxaceae.Ceratiomyxa	4.92082			-
Protist.Mycetozoa.Myxomycetes.Ceratiomyxales.Ceratiomyxaceae.Ceratiomyxa.Ceratiomyxafruticulosa	4.92082			-
Protist.Mycetozoa.Myxomycetes.Echinosteliales	5.26035			-
Protist.Mycetozoa.Myxomycetes.Echinosteliales.Clastodermataceae	5.08281			-
Protist.Mycetozoa.Myxomycetes.Echinosteliales.Clastodermataceae.Clastoderma	5.08281			-
Protist.Mycetozoa.Myxomycetes.Echinosteliales.Clastodermataceae.Clastoderma.Clastodermadebaryanum	5.08281			-
Protist.Mycetozoa.Myxomycetes.Echinosteliales.Echinosteliaceae	4.78612			-
Protist.Mycetozoa.Myxomycetes.Echinosteliales.Echinosteliaceae.Echinostelium	4.78612			-
Protist.Mycetozoa.Myxomycetes.Echinosteliales.Echinosteliaceae.Echinostelium.Echinosteliumminutum	4.78612			-
Protist.Mycetozoa.Myxomycetes.Liceales	4.98777			-
Protist.Mycetozoa.Myxomycetes.Liceales.Cribrariaceae	4.93506			-
Protist.Mycetozoa.Myxomycetes.Liceales.Cribrariaceae.Cribraria	4.93506			-
Protist.Mycetozoa.Myxomycetes.Liceales.Cribrariaceae.Cribraria.Cribrariaconfusa	0			-
Protist.Mycetozoa.Myxomycetes.Liceales.Cribrariaceae.Cribraria.Cribrariamicrocarpa	4.84164			-
Protist.Mycetozoa.Myxomycetes.Liceales.Cribrariaceae.Cribraria.Cribrariaminutissima	0			-
Protist.Mycetozoa.Myxomycetes.Liceales.Cribrariaceae.Cribraria.Cribrariaviolacea	4.22185			-
Protist.Mycetozoa.Myxomycetes.Liceales.Liceaceae	4.78612			-
Protist.Mycetozoa.Myxomycetes.Liceales.Liceaceae.Licea	4.78612			-
Protist.Mycetozoa.Myxomycetes.Liceales.Liceaceae.Licea.Liceabiforis	0			-
Protist.Mycetozoa.Myxomycetes.Liceales.Liceaceae.Licea.Liceacastanea	4.34679			-
Protist.Mycetozoa.Myxomycetes.Liceales.Liceaceae.Licea.Liceakleistobolus	4.07572			-
Protist.Mycetozoa.Myxomycetes.Liceales.Liceaceae.Licea.Liceaminima	4.4437			-
Protist.Mycetozoa.Myxomycetes.Liceales.Liceaceae.Licea.Liceaoperculata	4.31876			-
Protist.Mycetozoa.Myxomycetes.Liceales.Liceaceae.Licea.Liceapedicellata	0			-
Protist.Mycetozoa.Myxomycetes.Liceales.Liceaceae.Licea.Liceapusilla	0			-
Protist.Mycetozoa.Myxomycetes.Liceales.Liceaceae.Licea.Liceavariabilis	4.22185			-
Protist.Mycetozoa.Myxomycetes.Physarales	5.09334			-
Protist.Mycetozoa.Myxomycetes.Physarales.Didymiaceae	4.98317			-
Protist.Mycetozoa.Myxomycetes.Physarales.Didymiaceae.Diachea	4.4437			-
Protist.Mycetozoa.Myxomycetes.Physarales.Didymiaceae.Diachea.Diacheasplendens	4.04576			-
Protist.Mycetozoa.Myxomycetes.Physarales.Didymiaceae.Diachea.Diacheasubsessilis	4.4437			-
Protist.Mycetozoa.Myxomycetes.Physarales.Didymiaceae.Diderma	4.86909			-
Protist.Mycetozoa.Myxomycetes.Physarales.Didymiaceae.Diderma.Didermaeffusum	4.81049			-
Protist.Mycetozoa.Myxomycetes.Physarales.Didymiaceae.Diderma.Didermahemisphaericum	4.04576			-
Protist.Mycetozoa.Myxomycetes.Physarales.Didymiaceae.Didymium	0			-
Protist.Mycetozoa.Myxomycetes.Physarales.Didymiaceae.Didymium.Didymiumclavus	0			-
Protist.Mycetozoa.Myxomycetes.Physarales.Didymiaceae.Didymium.Didymiummelanospermum	0			-
Protist.Mycetozoa.Myxomycetes.Physarales.Didymiaceae.Didymium.Didymiumminus	0			-
Protist.Mycetozoa.Myxomycetes.Physarales.Didymiaceae.Didymium.Didymiumsquamulosum	0			-
Protist.Mycetozoa.Myxomycetes.Physarales.Physaraceae	4.70581			-
Protist.Mycetozoa.Myxomycetes.Physarales.Physaraceae.Physarum	4.70581			-
Protist.Mycetozoa.Myxomycetes.Physarales.Physaraceae.Physarum.Physarumalbum	4.22185			-
Protist.Mycetozoa.Myxomycetes.Physarales.Physaraceae.Physarum.Physarumbivalve	4.04576			-
Protist.Mycetozoa.Myxomycetes.Physarales.Physaraceae.Physarum.Physarumcinereum	4.14267			-
Protist.Mycetozoa.Myxomycetes.Physarales.Physaraceae.Physarum.Physarumlateritium	4.04576			-
Protist.Mycetozoa.Myxomycetes.Physarales.Physaraceae.Physarum.Physarummelleum	4.37675			-
Protist.Mycetozoa.Myxomycetes.Physarales.Physaraceae.Physarum.Physarumnucleatum	4.07572			-
Protist.Mycetozoa.Myxomycetes.Physarales.Physaraceae.Physarum.Physarumoblatum	0			-
Protist.Mycetozoa.Myxomycetes.Physarales.Physaraceae.Physarum.Physarumpusillum	4.4437			-
Protist.Mycetozoa.Myxomycetes.Stemonitales	5.43556			-
Protist.Mycetozoa.Myxomycetes.Stemonitales.Stemonitaceae	5.43556			-
Protist.Mycetozoa.Myxomycetes.Stemonitales.Stemonitaceae.Collaria	4.31876			-
Protist.Mycetozoa.Myxomycetes.Stemonitales.Stemonitaceae.Collaria.Collariaarcyrionema	4.31876			-
Protist.Mycetozoa.Myxomycetes.Stemonitales.Stemonitaceae.Colloderma	0			-
Protist.Mycetozoa.Myxomycetes.Stemonitales.Stemonitaceae.Colloderma.Collodermaoculatum	0			-
Protist.Mycetozoa.Myxomycetes.Stemonitales.Stemonitaceae.Comatricha	4.92082			-
Protist.Mycetozoa.Myxomycetes.Stemonitales.Stemonitaceae.Comatricha.Comatrichaaequalis	0			-
Protist.Mycetozoa.Myxomycetes.Stemonitales.Stemonitaceae.Comatricha.Comatrichanigra	4.47137			-
Protist.Mycetozoa.Myxomycetes.Stemonitales.Stemonitaceae.Comatricha.Comatrichapulchella	4.92082			-
Protist.Mycetozoa.Myxomycetes.Stemonitales.Stemonitaceae.Macbrideola	0			-
Protist.Mycetozoa.Myxomycetes.Stemonitales.Stemonitaceae.Macbrideola.Macbrideolascintillans	0			-
Protist.Mycetozoa.Myxomycetes.Stemonitales.Stemonitaceae.Paradiacheopsis	4.4437			-
Protist.Mycetozoa.Myxomycetes.Stemonitales.Stemonitaceae.Paradiacheopsis.Paradiacheopsiserythropodia	4.4437			-
Protist.Mycetozoa.Myxomycetes.Stemonitales.Stemonitaceae.Paradiacheopsis.Paradiacheopsisfimbriata	0			-
Protist.Mycetozoa.Myxomycetes.Stemonitales.Stemonitaceae.Stemonitis	5.18531			-
Protist.Mycetozoa.Myxomycetes.Stemonitales.Stemonitaceae.Stemonitis.Stemonitisfusca	5.18531			-
Protist.Mycetozoa.Myxomycetes.Stemonitales.Stemonitaceae.Stemonitopsis	5.27346			-
Protist.Mycetozoa.Myxomycetes.Stemonitales.Stemonitaceae.Stemonitopsis.Stemonitopsisreticulata	5.27346			-
Protist.Mycetozoa.Myxomycetes.Trichiales	5.82027			-
Protist.Mycetozoa.Myxomycetes.Trichiales.Dianemaceae	4.24413			-
Protist.Mycetozoa.Myxomycetes.Trichiales.Dianemaceae.Calomyxa	4.24413			-
Protist.Mycetozoa.Myxomycetes.Trichiales.Dianemaceae.Calomyxa.Calomyxametallica	4.24413			-
Protist.Mycetozoa.Myxomycetes.Trichiales.Trichiaceae	5.82027			-
Protist.Mycetozoa.Myxomycetes.Trichiales.Trichiaceae.Arcyria	5.75756			-
Protist.Mycetozoa.Myxomycetes.Trichiales.Trichiaceae.Arcyria.Arcyriacinerea	5.61598			-
Protist.Mycetozoa.Myxomycetes.Trichiales.Trichiaceae.Arcyria.Arcyriadenudata	5.52288			-
Protist.Mycetozoa.Myxomycetes.Trichiales.Trichiaceae.Hemitrichia	4.78612			-
Protist.Mycetozoa.Myxomycetes.Trichiales.Trichiaceae.Hemitrichia.Hemitrichiaminor	4.52288			-
Protist.Mycetozoa.Myxomycetes.Trichiales.Trichiaceae.Hemitrichia.Hemitrichiaserpula	4.78612			-
Protist.Mycetozoa.Myxomycetes.Trichiales.Trichiaceae.Perichaena	4.98599			-
Protist.Mycetozoa.Myxomycetes.Trichiales.Trichiaceae.Perichaena.Perichaenacorticalis	4.98599			-
Protist.Mycetozoa.Myxomycetes.Trichiales.Trichiaceae.Perichaena.Perichaenadepressa	4.4437			-
Protist.Mycetozoa.Myxomycetes.Trichiales.Trichiaceae.Perichaena.Perichaenapedata	0			-
Protist.Mycetozoa.Myxomycetes.Trichiales.Trichiaceae.Trichia	4.58983			-
Protist.Mycetozoa.Myxomycetes.Trichiales.Trichiaceae.Trichia.Trichiabotrytis	4.26761			-
Protist.Mycetozoa.Myxomycetes.Trichiales.Trichiaceae.Trichia.Trichiadecipiens	4.4437			-
Protist.Mycetozoa.Myxomycetes.Trichiales.Trichiaceae.Trichia.Trichiafavoginea	4.10791			-
