# Supplementary material for: Distribution and diversity of myxomycetes in Tiantangzhai National Forest Park, China
Source: PeerJ. 2021 Aug 25;9:e12059. doi: 10.7717/peerj.12059 (PMC8401731; doi:10.7717/peerj.12059)
Supplement: Supplemental Information 11 [file peerj-09-12059-s011.xlsx]

## Sheet: Sheet1
Supplemental data 11 Records of myxomycete species of MC-bark in different months (May: May; Jun: June; Jul: July; Aug: August; Sep: September; Oct: October; Sampling sites: QF, JP, YF, PP, WF, OB ).
MC-Bark-Month-Species	May-QF	May-JP	May-YF	May-PP	May-WF	May-OB	Jun-QF	Jun-JP	Jun-YF	Jun-PP	Jun-WF	Jun-OB	Jul-QF	Jul-JP	Jul-YF	Jul-PP	Jul-WF	Jul-OB	Aug-QF	Aug-JP	Aug-YF	Aug-PP	Aug-WF	Aug-OB	Sep-QF	Sep-JP	Sep-YF	Sep-PP	Sep-WF	Sep-OB	Oct-QF	Oct-JP	Oct-YF	Oct-PP	Oct-WF	Oct-OB
Arcyria cinerea	0	1	8	3	5	1	0	2	5	1	8	6	0	1	4	0	1	1	1	2	1	1	2	0	0	0	1	0	2	2	0	3	3	2	1	2
Arcyria denudata	0	0	0	1	0	0	0	0	0	0	0	0	0	0	0	0	0	0	0	0	0	0	0	0	0	0	0	0	0	0	0	0	0	0	0	0
Calomyxa metallica	0	0	0	0	0	0	0	0	0	0	0	0	1	2	2	0	0	0	0	0	0	0	0	0	0	0	0	0	0	0	0	0	0	0	0	0
Clastoderma debaryanum	0	6	10	1	8	10	1	1	2	2	3	5	0	5	5	1	15	1	0	4	9	4	16	9	0	0	4	3	4	6	0	0	6	4	6	8
Colloderma oculatum	0	0	11	20	10	11	0	0	7	7	16	7	0	0	6	21	12	10	0	0	13	4	18	9	0	0	8	10	8	9	0	0	9	4	9	5
Comatricha aequalis	0	0	0	0	0	0	0	0	0	0	0	0	0	0	0	0	0	0	0	0	1	0	0	0	0	0	0	0	0	0	0	0	0	0	0	0
Comatricha nigra	1	0	0	0	0	0	1	0	0	0	0	0	0	0	0	0	0	0	0	0	0	0	0	0	0	0	0	0	0	0	0	0	0	0	0	0
Comatricha pulchella	0	0	0	0	0	0	0	0	0	0	0	0	0	0	0	0	0	0	0	0	0	0	0	0	0	0	1	0	0	0	0	0	0	0	0	0
Cribraria confusa	3	10	0	0	0	0	2	4	0	0	0	0	1	0	0	0	0	0	0	2	0	0	0	0	0	0	0	0	0	0	0	0	0	0	0	0
Cribraria microcarpa	0	1	0	1	0	0	0	0	0	0	0	0	1	1	0	3	0	0	0	1	0	2	4	0	0	1	0	0	0	0	0	0	0	1	1	2
Cribraria minutissima	0	0	2	2	0	0	0	0	1	1	1	0	0	0	0	0	0	0	0	0	1	0	0	0	0	0	0	0	0	0	0	0	0	0	0	0
Diderma effusum	0	1	5	0	0	0	0	0	4	4	0	0	0	0	3	0	0	0	0	0	0	1	0	0	0	0	0	2	1	0	0	0	5	3	3	0
Didymium clavus	0	0	0	0	0	0	0	0	0	0	0	0	0	0	0	0	0	0	1	0	0	0	0	0	0	0	0	0	0	0	0	0	0	0	0	0
Didymium melanospermum	0	0	0	0	0	0	0	0	0	0	0	0	0	0	0	0	0	0	0	0	0	0	0	0	0	1	0	0	0	0	0	0	0	0	0	0
Didymium minus	0	0	0	0	0	0	1	0	0	0	0	0	0	0	0	0	0	0	0	0	0	0	0	0	0	0	0	0	0	0	0	0	0	0	0	0
Didymium squamulosum	0	1	0	0	0	0	0	0	0	1	0	0	0	0	0	0	0	0	0	0	0	0	0	0	0	0	0	0	0	0	0	0	0	0	0	0
Echinostelium minutum	0	2	5	4	0	2	1	4	1	10	3	4	0	2	6	5	7	6	0	1	1	3	5	6	0	0	2	0	1	1	0	1	6	2	0	5
Hemitrichia minor	0	0	0	0	0	0	0	0	0	0	0	0	0	0	0	0	0	0	0	0	0	1	0	0	0	0	1	0	0	0	0	0	0	0	0	0
Hemitrichia serpula	0	0	0	0	1	0	0	0	0	0	0	0	0	0	0	0	0	0	0	0	0	0	0	0	0	0	0	0	0	0	0	0	0	0	0	0
Licea biforis	0	0	1	0	0	0	0	0	0	0	0	0	0	0	1	0	0	0	0	1	0	0	0	0	0	0	0	0	0	0	0	0	2	0	0	0
Licea castanea	0	0	0	0	0	0	0	0	0	0	0	0	0	0	0	0	0	0	0	1	0	0	0	0	0	2	0	1	0	0	0	2	0	0	0	0
Licea minima	0	3	0	2	0	0	0	0	1	0	0	0	0	0	0	4	0	0	0	1	1	1	0	1	0	1	0	0	2	0	0	0	2	2	0	0
Licea operculata	0	0	3	2	0	3	0	0	1	0	0	1	2	0	5	1	0	2	0	1	8	8	0	7	0	0	2	4	4	3	0	0	5	3	2	0
Licea pedicellata	0	0	0	0	0	0	0	1	0	0	0	0	1	0	0	0	0	0	0	2	0	0	0	0	0	0	0	0	0	0	0	0	0	0	0	0
Licea pusilla	0	0	0	0	0	0	0	0	0	0	0	0	0	0	0	0	0	0	0	1	0	1	0	0	0	0	0	0	1	0	0	0	0	0	0	0
Licea variabilis	0	0	0	0	0	0	0	0	0	0	0	1	0	0	0	0	0	0	0	0	0	0	0	0	0	0	0	0	0	0	0	0	0	0	0	0
Macbrideola scintillans	0	5	0	0	0	0	0	1	0	0	0	0	0	0	0	0	0	0	0	2	0	0	0	0	0	0	0	0	0	0	0	0	0	0	0	0
Paradiacheopsis erythropodia	0	2	0	0	0	0	0	1	0	0	0	0	1	0	3	0	0	1	2	2	1	0	1	1	0	0	0	0	0	1	0	0	0	0	0	0
Paradiacheopsis fimbriata	0	0	0	0	0	0	0	0	0	0	0	0	0	0	0	0	0	0	0	1	0	1	0	0	0	0	0	0	0	0	0	0	0	0	0	0
Perichaena corticalis	0	2	1	1	0	0	0	0	0	1	0	0	0	0	2	1	0	0	0	1	3	3	0	0	0	0	0	0	2	0	1	0	0	2	0	0
Perichaena pedata	0	0	0	0	0	0	0	0	0	1	0	0	0	0	0	0	0	0	0	0	0	0	0	0	0	0	0	0	0	0	0	0	0	0	0	0
Physarum album	0	2	4	0	2	0	0	1	1	1	2	0	0	2	1	0	1	0	0	2	0	0	0	0	0	0	0	1	2	0	0	3	3	0	3	0
Physarum oblatum	0	0	0	0	0	0	0	0	0	0	0	0	0	0	0	0	0	0	0	0	0	0	1	0	0	0	0	0	0	0	0	0	0	0	0	0
Physarum pusillum	0	0	0	0	0	0	0	1	0	0	0	0	0	0	1	0	0	0	0	0	0	0	0	0	0	0	0	0	0	0	0	0	0	0	1	0
Stemonitis fusca	0	1	0	0	0	0	1	1	0	0	0	0	0	0	0	0	0	0	0	4	0	0	0	0	0	0	0	0	0	0	0	2	0	0	0	0
Stemonitopsis reticulata	0	0	0	0	0	0	0	1	1	1	0	0	0	0	0	0	0	0	0	0	0	0	0	0	0	0	0	0	0	0	0	0	1	0	0	0
Trichia botrytis	0	4	0	1	0	1	1	1	0	0	0	1	0	0	1	0	0	0	3	1	2	4	2	0	0	0	0	1	0	0	0	0	0	0	0	1
Trichia favoginea	0	0	0	0	0	0	2	0	0	0	0	0	0	0	0	0	0	0	0	0	0	0	0	0	0	0	0	0	0	0	0	0	0	0	0	0
